# Supplementary material
Source: publisher figshare collection journal article supplement (https://acs.figshare.com/ndownloader/files/5703870)
Supplement: Supplementary file 1 [file 5703870]

# ic951630i.cif

data_master_file_afc7*.xtl
The CIF file of compound Cr(CO)3(C6H5C5H4)Mo(CO)3Br (13)
#------------------------------------------------------------------------------
_audit_creation_date                  'Tue May 14 10:50:00 1996'
_audit_creation_method                'from TEXRAY.INF file'
_audit_update_record                   ?
#------------------------------------------------------------------------------
_computing_data_collection            'MSC/AFC Diffractometer Control'
_computing_cell_refinement            'MSC/AFC Diffractometer Control'
_computing_data_reduction             'teXsan: PROCESS (MSC)'
_computing_structure_solution          ?
_computing_structure_refinement       'teXsan: LS (MSC)'
_computing_publication_material       'teXsan: FINISH (MSC)'
#------------------------------------------------------------------------------
_cell_length_a                         14.685(2)
_cell_length_b                         8.509(3)
_cell_length_c                         14.960(3)
_cell_angle_alpha                      90
_cell_angle_beta                       104.46(1)
_cell_angle_gamma                      90
_cell_volume                           1810.0(7)
_cell_formula_units_Z                  4.00
_cell_measurement_temperature          20.0
_cell_measurement_reflns_used          25
_cell_measurement_theta_min            23.56
_cell_measurement_theta_max            26.45
#------------------------------------------------------------------------------
_symmetry_cell_setting                 monoclinic
_symmetry_space_group_name_H-M        'P 21/c     '
_symmetry_Int_Tables_number            14
_symmetry_space_group_name_Hall        ?
loop_
_symmetry_equiv_pos_as_xyz
  '   +x,   +y,   +z'
  '   -x,1/2+y,1/2-z'
  '   -x,   -y,   -z'
  '   +x,1/2-y,1/2+z'
#------------------------------------------------------------------------------
_exptl_crystal_description            'prismatic'
_exptl_crystal_colour                 'red'
_exptl_crystal_size_max                0.300
_exptl_crystal_size_mid                ?
_exptl_crystal_size_min                0.200
_exptl_crystal_density_diffrn          1.971
_exptl_crystal_density_measured        ?
_exptl_crystal_F000                    1040.00
_exptl_absorpt_coefficient_mu_cm       35.363
_exptl_absorpt_correction_type         empirical
_exptl_absorpt_process_descript        psi-scan
_exptl_absorpt_correction_T_max        1.000
_exptl_absorpt_correction_T_min        0.583
#------------------------------------------------------------------------------
_diffrn_special_details                none
_diffrn_ambient_temperature            20.0
_diffrn_radiation_wavelength           0.7107
_diffrn_radiation_type                 MoKalpha
_diffrn_radiation_source              'X-ray tube'
_diffrn_radiation_monochromator        graphite
_diffrn_radiation_detector             ?
_diffrn_measurement_device            'AFC7R'
_diffrn_measurement_method            'omega/2-theta scans'

_diffrn_standards_number              3
_diffrn_standards_interval_count      150
_diffrn_standards_decay_\%             -0.64
loop_
_diffrn_standard_refln_index_h
_diffrn_standard_refln_index_k
_diffrn_standard_refln_index_l
   ? ? ?    ? ? ?    ? ? ?  

_diffrn_reflns_number                  4606
_diffrn_reflns_av_R_equivalents        4.48
_diffrn_reflns_av_sigmaI/Inet          ?
_diffrn_reflns_h_min                   0
_diffrn_reflns_h_max                   19
_diffrn_reflns_k_min                   0
_diffrn_reflns_k_max                   10
_diffrn_reflns_l_min                   -18
_diffrn_reflns_l_max                   18
_diffrn_theta_min                      ?
_diffrn_theta_max                      27.4993
_diffrn_reflns_reduction_process       ?

_diffrn_orient_matrix_11              -0.06858
_diffrn_orient_matrix_12              -0.00945
_diffrn_orient_matrix_13              -0.00301
_diffrn_orient_matrix_21               0.01269
_diffrn_orient_matrix_22              -0.09744
_diffrn_orient_matrix_23               0.03848
_diffrn_orient_matrix_31               0.00905
_diffrn_orient_matrix_32               0.06502
_diffrn_orient_matrix_33               0.05723
#------------------------------------------------------------------------------
loop_
_atom_type_symbol
_atom_type_oxidation_number
_atom_type_number_in_cell
_atom_type_scat_dispersion_real
_atom_type_scat_dispersion_imag
_atom_type_scat_source
  C  0    68 0.003 0.002    'International Tables'
  H  0    36 0.000 0.000    'International Tables'
  Br 0     4 -0.290 2.459    'International Tables'
  O  0    24 0.011 0.006    'International Tables'
  Cr 0     4 0.321 0.624    'International Tables'
  Mo 0     4 -1.683 0.686    'International Tables'
#------------------------------------------------------------------------------
loop_
_atom_site_label
_atom_site_fract_x
_atom_site_fract_y
_atom_site_fract_z
_atom_site_U_iso_or_equiv
_atom_site_thermal_displace_type
_atom_site_calc_flag
_atom_site_calc_attached_atom
 Mo     0.16569(4)  0.26482(6)  -0.04681(4) 0.0326(1)   Uij ? ?
 Br     0.21528(7)  0.06063(9)  0.08955(5)  0.0588(2)   Uij ? ?
 Cr     0.34273(7)  -0.1416(1)  -0.23540(7) 0.0321(3)   Uij ? ?
 O1     0.0376(4)   0.3634(7)   0.0849(4)   0.086(2)    Uij ? ?
 O2     0.1723(4)   0.6302(6)   -0.0684(5)  0.087(2)    Uij ? ?
 O3     0.3790(4)   0.3441(7)   0.0345(4)   0.079(2)    Uij ? ?
 O5     0.3516(5)   -0.4816(6)  -0.1842(4)  0.082(2)    Uij ? ?
 O6     0.1418(4)   -0.1792(7)  -0.3391(5)  0.096(2)    Uij ? ?
 O7     0.3927(4)   -0.2145(6)  -0.4135(3)  0.074(2)    Uij ? ?
 C1     0.1991(5)   0.1092(7)   -0.1641(4)  0.034(2)    Uij ? ?
 C2     0.1568(5)   0.2532(8)   -0.2009(4)  0.042(2)    Uij ? ?
 C3     0.0640(5)   0.2620(9)   -0.1893(5)  0.049(2)    Uij ? ?
 C4     0.0476(5)   0.1191(9)   -0.1472(5)  0.047(2)    Uij ? ?
 C5     0.1301(5)   0.0275(8)   -0.1323(4)  0.038(2)    Uij ? ?
 C6     0.2952(4)   0.0578(7)   -0.1623(4)  0.031(2)    Uij ? ?
 C7     0.3416(5)   0.1186(7)   -0.2267(4)  0.036(2)    Uij ? ?
 C8     0.4324(5)   0.0686(8)   -0.2253(5)  0.044(2)    Uij ? ?
 C9     0.4790(5)   -0.0408(9)  -0.1596(5)  0.047(2)    Uij ? ?
 C10    0.4335(5)   -0.1025(8)  -0.0963(4)  0.042(2)    Uij ? ?
 C11    0.3426(5)   -0.0503(8)  -0.0964(4)  0.037(2)    Uij ? ?
 C12    0.3737(5)   -0.1885(7)  -0.3448(5)  0.045(2)    Uij ? ?
 C13    0.3469(5)   -0.3512(8)  -0.2043(5)  0.048(2)    Uij ? ?
 C14    0.2197(5)   -0.1664(8)  -0.2988(6)  0.055(2)    Uij ? ?
 C15    0.0855(5)   0.3290(8)   0.0388(5)   0.051(2)    Uij ? ?
 C16    0.1695(5)   0.4987(8)   -0.0599(5)  0.051(2)    Uij ? ?
 C17    0.3002(6)   0.3177(8)   0.0075(5)   0.049(2)    Uij ? ?
 H1     0.186(4)    0.324(7)    -0.223(4)   0.04(1)     Uij ? ?
 H2     0.012(5)    0.327(7)    -0.213(4)   0.05(1)     Uij ? ?
 H3     -0.001(5)   0.087(8)    -0.132(5)   0.063(10)   Uij ? ?
 H4     0.137(3)    -0.060(6)   -0.109(3)   0.01(1)     Uij ? ?
 H5     0.316(4)    -0.106(7)   -0.060(4)   0.04(1)     Uij ? ?
 H6     0.461(4)    -0.189(6)   -0.054(4)   0.03(1)     Uij ? ?
 H7     0.525(5)    -0.069(9)   -0.161(5)   0.065(9)    Uij ? ?
 H8     0.458(5)    0.106(8)    -0.268(5)   0.06(1)     Uij ? ?
 H9     0.313(4)    0.189(7)    -0.267(4)   0.04(1)     Uij ? ?

loop_
_atom_site_aniso_label
_atom_site_aniso_U_11
_atom_site_aniso_U_22
_atom_site_aniso_U_33
_atom_site_aniso_U_12
_atom_site_aniso_U_13
_atom_site_aniso_U_23
 Mo     0.0384(3)   0.0289(3)   0.0331(3)   0.0097(3)   0.0135(2)   0.0020(2)  
 Br     0.0944(7)   0.0488(4)   0.0347(4)   0.0229(4)   0.0191(4)   0.0088(3)  
 Cr     0.0306(6)   0.0315(5)   0.0368(5)   -0.0006(4)  0.0133(5)   -0.0046(4) 
 O1     0.089(5)    0.111(5)    0.075(4)    0.041(4)    0.051(4)    0.006(4)   
 O2     0.094(5)    0.039(3)    0.138(6)    0.008(3)    0.047(4)    0.010(3)   
 O3     0.053(4)    0.082(4)    0.092(5)    0.007(4)    0.002(4)    -0.016(4)  
 O5     0.125(6)    0.037(3)    0.085(4)    -0.008(3)   0.027(4)    0.008(3)   
 O6     0.037(4)    0.096(5)    0.143(6)    -0.004(3)   -0.001(4)   -0.047(4)  
 O7     0.109(5)    0.077(4)    0.046(3)    0.002(3)    0.038(3)    -0.010(3)  
 C1     0.041(4)    0.035(3)    0.025(3)    0.005(3)    0.007(3)    -0.001(3)  
 C2     0.047(4)    0.051(4)    0.031(3)    0.007(4)    0.014(3)    0.006(3)   
 C3     0.041(4)    0.066(5)    0.042(4)    0.016(4)    0.011(3)    0.006(4)   
 C4     0.040(5)    0.063(5)    0.041(4)    -0.003(4)   0.013(3)    -0.008(4)  
 C5     0.048(5)    0.030(4)    0.036(4)    0.002(3)    0.008(3)    -0.002(3)  
 C6     0.036(4)    0.030(3)    0.028(3)    0.001(3)    0.009(3)    -0.008(3)  
 C7     0.040(4)    0.030(3)    0.042(4)    -0.004(3)   0.012(3)    -0.003(3)  
 C8     0.038(4)    0.042(4)    0.057(4)    -0.010(3)   0.022(4)    0.000(3)   
 C9     0.033(4)    0.051(4)    0.058(4)    -0.008(4)   0.013(4)    -0.017(4)  
 C10    0.039(4)    0.047(4)    0.035(3)    0.005(3)    0.002(3)    -0.007(3)  
 C11    0.040(4)    0.045(4)    0.029(3)    0.006(3)    0.014(3)    0.001(3)   
 C12    0.049(5)    0.039(4)    0.048(4)    -0.001(3)   0.015(4)    -0.005(3)  
 C13    0.058(5)    0.045(4)    0.046(4)    -0.012(4)   0.023(4)    -0.007(3)  
 C14    0.038(5)    0.047(4)    0.082(6)    -0.002(4)   0.020(4)    -0.024(4)  
 C15    0.055(5)    0.045(4)    0.057(5)    0.014(4)    0.018(4)    -0.003(4)  
 C16    0.050(5)    0.032(4)    0.075(5)    0.013(4)    0.025(4)    0.005(4)   
 C17    0.044(5)    0.048(4)    0.052(4)    0.015(4)    0.007(4)    -0.007(3)  
#------------------------------------------------------------------------------
_refine_special_details                ?
_refine_ls_structure_factor_coef       F
_refine_ls_matrix_type                 full
_refine_ls_weighting_scheme            sigma
_refine_ls_hydrogen_treatment          ?
_refine_ls_extinction_method           Zachariasen_type_2_Gaussian_isotropic
_refine_ls_extinction_coef             0.00000
_refine_ls_abs_structure_details       ?
_refine_ls_abs_structure_Flack         ?
_refine_ls_number_reflns               2317
_refine_ls_number_parameters           271
_refine_ls_number_restraints           0
_refine_ls_number_constraints          ?
_refine_ls_R_factor_all                ?
_refine_ls_R_factor_obs                0.0370
_refine_ls_wR_factor_all               ?
_refine_ls_wR_factor_obs               0.0370
_refine_ls_goodness_of_fit_all         ?
_refine_ls_goodness_of_fit_obs         1.310
_refine_ls_shift/esd_max               0.0560
_refine_ls_shift/esd_mean              ?
_refine_diff_density_min               0.63770
_refine_diff_density_max               -0.50200
#------------------------------------------------------------------------------
_geom_special_details                  ?
loop_
_geom_bond_atom_site_label_1
_geom_bond_atom_site_label_2
_geom_bond_distance
_geom_bond_site_symmetry_1
_geom_bond_site_symmetry_2
_geom_bond_publ_flag
    Mo        Br        2.640(1)   ? ? yes
    Mo        C(1)      2.346(5)   ? ? yes
    Mo        C(2)      2.278(6)   ? ? yes
    Mo        C(3)      2.276(7)   ? ? yes
    Mo        C(4)      2.346(7)   ? ? yes
    Mo        C(5)      2.378(6)   ? ? yes
    Mo        C(15)     2.019(7)   ? ? yes
    Mo        C(16)     2.002(7)   ? ? yes
    Mo        C(17)     1.990(8)   ? ? yes
    Cr        C(6)      2.224(5)   ? ? yes
    Cr        C(7)      2.219(6)   ? ? yes
    Cr        C(8)      2.204(7)   ? ? yes
    Cr        C(9)      2.212(7)   ? ? yes
    Cr        C(10)     2.198(6)   ? ? yes
    Cr        C(11)     2.221(6)   ? ? yes
    Cr        C(12)     1.848(7)   ? ? yes
    Cr        C(13)     1.840(7)   ? ? yes
    Cr        C(14)     1.831(8)   ? ? yes
    O(1)      C(15)     1.140(8)   ? ? yes
    O(2)      C(16)     1.127(8)   ? ? yes
    O(3)      C(17)     1.149(8)   ? ? yes
    O(5)      C(13)     1.147(8)   ? ? yes
    O(6)      C(14)     1.158(8)   ? ? yes
    O(7)      C(12)     1.151(7)   ? ? yes
    C(1)      C(2)      1.422(8)   ? ? yes
    C(1)      C(5)      1.407(9)   ? ? yes
    C(1)      C(6)      1.471(8)   ? ? yes
    C(2)      C(3)      1.418(9)   ? ? yes
    C(3)      C(4)      1.417(10)  ? ? yes
    C(4)      C(5)      1.411(10)  ? ? yes
    C(6)      C(7)      1.410(8)   ? ? yes
    C(6)      C(11)     1.400(8)   ? ? yes
    C(7)      C(8)      1.396(9)   ? ? yes
    C(8)      C(9)      1.40(1)    ? ? yes
    C(9)      C(10)     1.392(10)  ? ? yes
    C(10)     C(11)     1.406(9)   ? ? yes
#------------------------------------------------------------------------------
loop_
_geom_angle_atom_site_label_1
_geom_angle_atom_site_label_2
_geom_angle_atom_site_label_3
_geom_angle
_geom_angle_site_symmetry_1
_geom_angle_site_symmetry_2
_geom_angle_site_symmetry_3
_geom_bond_publ_flag
   Br        Mo        C(1)      97.9(1)    ? ? ? yes
   Br        Mo        C(2)      133.5(2)   ? ? ? yes
   Br        Mo        C(3)      134.9(2)   ? ? ? yes
   Br        Mo        C(4)      99.4(2)    ? ? ? yes
   Br        Mo        C(5)      80.7(2)    ? ? ? yes
   Br        Mo        C(15)     77.3(2)    ? ? ? yes
   Br        Mo        C(16)     136.1(2)   ? ? ? yes
   Br        Mo        C(17)     77.2(2)    ? ? ? yes
   C(1)      Mo        C(2)      35.8(2)    ? ? ? yes
   C(1)      Mo        C(3)      60.3(2)    ? ? ? yes
   C(1)      Mo        C(4)      58.8(2)    ? ? ? yes
   C(1)      Mo        C(5)      34.6(2)    ? ? ? yes
   C(1)      Mo        C(15)     153.0(3)   ? ? ? yes
   C(1)      Mo        C(16)     118.2(3)   ? ? ? yes
   C(1)      Mo        C(17)     93.5(3)    ? ? ? yes
   C(2)      Mo        C(3)      36.3(2)    ? ? ? yes
   C(2)      Mo        C(4)      58.9(2)    ? ? ? yes
   C(2)      Mo        C(5)      58.0(2)    ? ? ? yes
   C(2)      Mo        C(15)     139.3(3)   ? ? ? yes
   C(2)      Mo        C(16)     86.6(3)    ? ? ? yes
   C(2)      Mo        C(17)     102.9(3)   ? ? ? yes
   C(3)      Mo        C(4)      35.7(3)    ? ? ? yes
   C(3)      Mo        C(5)      58.9(3)    ? ? ? yes
   C(3)      Mo        C(15)     104.3(3)   ? ? ? yes
   C(3)      Mo        C(16)     87.0(3)    ? ? ? yes
   C(3)      Mo        C(17)     137.4(3)   ? ? ? yes
   C(4)      Mo        C(5)      34.8(2)    ? ? ? yes
   C(4)      Mo        C(15)     95.4(3)    ? ? ? yes
   C(4)      Mo        C(16)     119.8(3)   ? ? ? yes
   C(4)      Mo        C(17)     151.7(3)   ? ? ? yes
   C(5)      Mo        C(15)     119.1(3)   ? ? ? yes
   C(5)      Mo        C(16)     143.1(3)   ? ? ? yes
   C(5)      Mo        C(17)     118.3(3)   ? ? ? yes
   C(15)     Mo        C(16)     80.1(3)    ? ? ? yes
   C(15)     Mo        C(17)     110.9(3)   ? ? ? yes
   C(16)     Mo        C(17)     76.5(3)    ? ? ? yes
   C(6)      Cr        C(7)      37.0(2)    ? ? ? yes
   C(6)      Cr        C(8)      66.6(2)    ? ? ? yes
   C(6)      Cr        C(9)      78.8(2)    ? ? ? yes
   C(6)      Cr        C(10)     67.0(2)    ? ? ? yes
   C(6)      Cr        C(11)     36.7(2)    ? ? ? yes
   C(6)      Cr        C(12)     141.0(3)   ? ? ? yes
   C(6)      Cr        C(13)     127.6(3)   ? ? ? yes
   C(6)      Cr        C(14)     87.3(3)    ? ? ? yes
   C(7)      Cr        C(8)      36.8(2)    ? ? ? yes
   C(7)      Cr        C(9)      66.5(3)    ? ? ? yes
   C(7)      Cr        C(10)     78.8(3)    ? ? ? yes
   C(7)      Cr        C(11)     66.1(2)    ? ? ? yes
   C(7)      Cr        C(12)     105.9(3)   ? ? ? yes
   C(7)      Cr        C(13)     162.3(3)   ? ? ? yes
   C(7)      Cr        C(14)     97.1(3)    ? ? ? yes
   C(8)      Cr        C(9)      37.0(3)    ? ? ? yes
   C(8)      Cr        C(10)     66.5(3)    ? ? ? yes
   C(8)      Cr        C(11)     78.0(3)    ? ? ? yes
   C(8)      Cr        C(12)     87.8(3)    ? ? ? yes
   C(8)      Cr        C(13)     142.0(3)   ? ? ? yes
   C(8)      Cr        C(14)     128.6(3)   ? ? ? yes
   C(9)      Cr        C(10)     36.8(3)    ? ? ? yes
   C(9)      Cr        C(11)     66.2(3)    ? ? ? yes
   C(9)      Cr        C(12)     98.4(3)    ? ? ? yes
   C(9)      Cr        C(13)     106.1(3)   ? ? ? yes
   C(9)      Cr        C(14)     163.6(3)   ? ? ? yes
   C(10)     Cr        C(11)     37.1(2)    ? ? ? yes
   C(10)     Cr        C(12)     130.2(3)   ? ? ? yes
   C(10)     Cr        C(13)     86.2(3)    ? ? ? yes
   C(10)     Cr        C(14)     142.6(3)   ? ? ? yes
   C(11)     Cr        C(12)     164.3(3)   ? ? ? yes
   C(11)     Cr        C(13)     96.3(3)    ? ? ? yes
   C(11)     Cr        C(14)     107.1(3)   ? ? ? yes
   C(12)     Cr        C(13)     90.9(3)    ? ? ? yes
   C(12)     Cr        C(14)     86.9(3)    ? ? ? yes
   C(13)     Cr        C(14)     89.2(3)    ? ? ? yes
   Mo        C(1)      C(2)      69.5(3)    ? ? ? yes
   Mo        C(1)      C(5)      73.9(3)    ? ? ? yes
   Mo        C(1)      C(6)      122.2(4)   ? ? ? yes
   C(2)      C(1)      C(5)      106.0(6)   ? ? ? yes
   C(2)      C(1)      C(6)      126.0(6)   ? ? ? yes
   C(5)      C(1)      C(6)      128.0(6)   ? ? ? yes
   Mo        C(2)      C(1)      74.7(3)    ? ? ? yes
   Mo        C(2)      C(3)      71.8(4)    ? ? ? yes
   C(1)      C(2)      C(3)      109.8(6)   ? ? ? yes
   Mo        C(3)      C(2)      71.9(4)    ? ? ? yes
   Mo        C(3)      C(4)      74.8(4)    ? ? ? yes
   C(2)      C(3)      C(4)      106.5(6)   ? ? ? yes
   Mo        C(4)      C(3)      69.5(4)    ? ? ? yes
   Mo        C(4)      C(5)      73.9(4)    ? ? ? yes
   C(3)      C(4)      C(5)      108.0(6)   ? ? ? yes
   Mo        C(5)      C(1)      71.4(3)    ? ? ? yes
   Mo        C(5)      C(4)      71.4(4)    ? ? ? yes
   C(1)      C(5)      C(4)      109.7(6)   ? ? ? yes
   Cr        C(6)      C(1)      129.4(4)   ? ? ? yes
   Cr        C(6)      C(7)      71.3(3)    ? ? ? yes
   Cr        C(6)      C(11)     71.5(3)    ? ? ? yes
   C(1)      C(6)      C(7)      120.2(5)   ? ? ? yes
   C(1)      C(6)      C(11)     120.9(5)   ? ? ? yes
   C(7)      C(6)      C(11)     118.9(6)   ? ? ? yes
   Cr        C(7)      C(6)      71.7(3)    ? ? ? yes
   Cr        C(7)      C(8)      71.0(4)    ? ? ? yes
   C(6)      C(7)      C(8)      120.0(6)   ? ? ? yes
   Cr        C(8)      C(7)      72.2(4)    ? ? ? yes
   Cr        C(8)      C(9)      71.8(4)    ? ? ? yes
   C(7)      C(8)      C(9)      120.7(6)   ? ? ? yes
   Cr        C(9)      C(8)      71.2(4)    ? ? ? yes
   Cr        C(9)      C(10)     71.1(4)    ? ? ? yes
   C(8)      C(9)      C(10)     119.6(7)   ? ? ? yes
   Cr        C(10)     C(9)      72.2(4)    ? ? ? yes
   Cr        C(10)     C(11)     72.3(4)    ? ? ? yes
   C(9)      C(10)     C(11)     119.8(7)   ? ? ? yes
   Cr        C(11)     C(6)      71.7(3)    ? ? ? yes
   Cr        C(11)     C(10)     70.6(3)    ? ? ? yes
   C(6)      C(11)     C(10)     120.8(6)   ? ? ? yes
   Cr        C(12)     O(7)      178.6(6)   ? ? ? yes
   Cr        C(13)     O(5)      178.5(7)   ? ? ? yes
   Cr        C(14)     O(6)      178.8(7)   ? ? ? yes
   Mo        C(15)     O(1)      177.7(7)   ? ? ? yes
   Mo        C(16)     O(2)      178.9(7)   ? ? ? yes
   Mo        C(17)     O(3)      176.0(6)   ? ? ? yes
#------------------------------------------------------------------------------
' # = = = end '
#------------------------------------------------------------------------------
data_master_file_afc7*.xtl
The CIF file of compound Cr(CO)3(C6H5C9H6)Mn(CO)3 (19)
#------------------------------------------------------------------------------
_audit_creation_date                  'Tue May 14 13:05:05 1996'
_audit_creation_method                'from TEXRAY.INF file'
_audit_update_record                   ?
#------------------------------------------------------------------------------
_computing_data_collection            'MSC/AFC Diffractometer Control'
_computing_cell_refinement            'MSC/AFC Diffractometer Control'
_computing_data_reduction             'teXsan: PROCESS (MSC)'
_computing_structure_solution          ?
_computing_structure_refinement       'teXsan: LS (MSC)'
_computing_publication_material       'teXsan: FINISH (MSC)'
#------------------------------------------------------------------------------
_cell_length_a                         11.660(4)
_cell_length_b                         12.578(5)
_cell_length_c                         6.987(2)
_cell_angle_alpha                      100.03(3)
_cell_angle_beta                       104.19(2)
_cell_angle_gamma                      71.99(3)
_cell_volume                           939.3(6)
_cell_formula_units_Z                  2.00
_cell_measurement_temperature          20.0
_cell_measurement_reflns_used          25
_cell_measurement_theta_min            23.47
_cell_measurement_theta_max            26.54
#------------------------------------------------------------------------------
_symmetry_cell_setting                 triclinic
_symmetry_space_group_name_H-M        'P -1       '
_symmetry_Int_Tables_number            2
_symmetry_space_group_name_Hall        ?
loop_
_symmetry_equiv_pos_as_xyz
  '   +x,   +y,   +z'
  '   -x,   -y,   -z'
#------------------------------------------------------------------------------
_exptl_crystal_description            'prismatic'
_exptl_crystal_colour                 'colorless'
_exptl_crystal_size_max                0.300
_exptl_crystal_size_mid                ?
_exptl_crystal_size_min                0.200
_exptl_crystal_density_diffrn          1.648
_exptl_crystal_density_measured        ?
_exptl_crystal_F000                    468.00
_exptl_absorpt_coefficient_mu_cm       12.870
_exptl_absorpt_correction_type         empirical
_exptl_absorpt_process_descript        psi-scan
_exptl_absorpt_correction_T_max        1.000
_exptl_absorpt_correction_T_min        0.960
#------------------------------------------------------------------------------
_diffrn_special_details                none
_diffrn_ambient_temperature            20.0
_diffrn_radiation_wavelength           0.7107
_diffrn_radiation_type                 MoKalpha
_diffrn_radiation_source              'X-ray tube'
_diffrn_radiation_monochromator        graphite
_diffrn_radiation_detector             ?
_diffrn_measurement_device            'AFC7R'
_diffrn_measurement_method            'omega/2-theta scans'

_diffrn_standards_number              3
_diffrn_standards_interval_count      150
_diffrn_standards_decay_\%             -0.14
loop_
_diffrn_standard_refln_index_h
_diffrn_standard_refln_index_k
_diffrn_standard_refln_index_l
   ? ? ?    ? ? ?    ? ? ?  

_diffrn_reflns_number                  3352
_diffrn_reflns_av_R_equivalents        3.42
_diffrn_reflns_av_sigmaI/Inet          ?
_diffrn_reflns_h_min                   0
_diffrn_reflns_h_max                   12
_diffrn_reflns_k_min                   -14
_diffrn_reflns_k_max                   14
_diffrn_reflns_l_min                   -8
_diffrn_reflns_l_max                   8
_diffrn_theta_min                      ?
_diffrn_theta_max                      24.9961
_diffrn_reflns_reduction_process       ?

_diffrn_orient_matrix_11              -0.08515
_diffrn_orient_matrix_12              -0.00866
_diffrn_orient_matrix_13              -0.04712
_diffrn_orient_matrix_21               0.03411
_diffrn_orient_matrix_22              -0.08338
_diffrn_orient_matrix_23              -0.00005
_diffrn_orient_matrix_31              -0.00863
_diffrn_orient_matrix_32               0.00652
_diffrn_orient_matrix_33               0.14081
#------------------------------------------------------------------------------
loop_
_atom_type_symbol
_atom_type_oxidation_number
_atom_type_number_in_cell
_atom_type_scat_dispersion_real
_atom_type_scat_dispersion_imag
_atom_type_scat_source
  C  0    42 0.003 0.002    'International Tables'
  H  0    22 0.000 0.000    'International Tables'
  O  0    12 0.011 0.006    'International Tables'
  Cr 0     2 0.321 0.624    'International Tables'
  Mn 0     2 0.337 0.728    'International Tables'
#------------------------------------------------------------------------------
loop_
_atom_site_label
_atom_site_fract_x
_atom_site_fract_y
_atom_site_fract_z
_atom_site_U_iso_or_equiv
_atom_site_thermal_displace_type
_atom_site_calc_flag
_atom_site_calc_attached_atom
 Mn     0.16722(6)  -0.26140(5) 0.13261(10) 0.0324      Uij ? ?
 Cr     -0.28837(6) -0.16457(6) 0.2420(1)   0.0367      Uij ? ?
 O1     0.0636(4)   -0.3770(4)  -0.2393(6)  0.0678      Uij ? ?
 O2     0.1352(4)   -0.0697(3)  -0.0812(7)  0.0750      Uij ? ?
 O3     0.4236(4)   -0.3583(5)  0.0823(7)   0.0856      Uij ? ?
 O4     -0.5009(5)  -0.1557(7)  0.4195(9)   0.1341      Uij ? ?
 O5     -0.3965(4)  0.0792(4)   0.1829(7)   0.0819      Uij ? ?
 O6     -0.1499(4)  -0.0921(4)  0.6383(5)   0.0703      Uij ? ?
 C1     0.3327(5)   -0.3758(6)  0.5379(9)   0.0574      Uij ? ?
 C2     0.3432(5)   -0.4860(6)  0.5265(9)   0.0590      Uij ? ?
 C3     0.2479(5)   -0.5322(5)  0.4172(8)   0.0526      Uij ? ?
 C4     0.1389(5)   -0.4662(4)  0.3231(7)   0.0401      Uij ? ?
 C5     0.1217(4)   -0.3484(4)  0.3390(6)   0.0335      Uij ? ?
 C6     0.0179(4)   -0.2555(4)  0.2684(6)   0.0321      Uij ? ?
 C7     0.0564(4)   -0.1560(4)  0.3323(7)   0.0378      Uij ? ?
 C8     0.1815(5)   -0.1848(5)  0.4325(8)   0.0464      Uij ? ?
 C9     0.2196(4)   -0.3027(4)  0.4445(6)   0.0391      Uij ? ?
 C10    -0.1068(4)  -0.2625(4)  0.1639(6)   0.0328      Uij ? ?
 C11    -0.1606(4)  -0.3360(4)  0.2211(7)   0.0388      Uij ? ?
 C12    -0.2787(5)  -0.3418(5)  0.1258(8)   0.0468      Uij ? ?
 C13    -0.3475(5)  -0.2731(5)  -0.0256(7)  0.0458      Uij ? ?
 C14    -0.2970(4)  -0.1988(4)  -0.0792(7)  0.0422      Uij ? ?
 C15    -0.1769(4)  -0.1936(4)  0.0134(6)   0.0363      Uij ? ?
 C16    0.1492(5)   -0.1447(4)  0.0030(8)   0.0457      Uij ? ?
 C17    0.3246(5)   -0.3202(5)  0.1005(8)   0.0553      Uij ? ?
 C18    0.1073(4)   -0.3343(4)  -0.0935(7)  0.0412      Uij ? ?
 C19    -0.4192(6)  -0.1583(7)  0.353(1)    0.0790      Uij ? ?
 C20    -0.3561(5)  -0.0153(5)  0.2060(8)   0.0521      Uij ? ?
 C21    -0.2044(5)  -0.1204(4)  0.4901(7)   0.0465      Uij ? ?
 H1     0.380(7)    -0.338(7)   0.61(1)     0.10(2)     Uij ? ?
 H2     0.420(6)    -0.527(5)   0.599(8)    0.06(2)     Uij ? ?
 H3     0.260(5)    -0.612(5)   0.383(8)    0.06(2)     Uij ? ?
 H4     0.073(5)    -0.495(4)   0.242(7)    0.04(1)     Uij ? ?
 H5     -0.115(5)   -0.384(5)   0.311(8)    0.05(1)     Uij ? ?
 H6     -0.313(4)   -0.386(4)   0.157(6)    0.02(1)     Uij ? ?
 H7     -0.424(5)   -0.284(4)   -0.096(7)   0.03(1)     Uij ? ?
 H8     -0.339(5)   -0.149(5)   -0.152(8)   0.06(2)     Uij ? ?
 H9     -0.153(4)   -0.136(4)   -0.012(7)   0.04(1)     Uij ? ?
 H10    0.010(5)    -0.086(5)   0.317(8)    0.05(1)     Uij ? ?
 H11    0.227(4)    -0.139(4)   0.492(7)    0.03(1)     Uij ? ?

loop_
_atom_site_aniso_label
_atom_site_aniso_U_11
_atom_site_aniso_U_22
_atom_site_aniso_U_33
_atom_site_aniso_U_12
_atom_site_aniso_U_13
_atom_site_aniso_U_23
 Mn     0.0242(4)   0.0382(4)   0.0393(4)   -0.0115(3)  0.0041(3)   0.0138(3)  
 Cr     0.0239(4)   0.0511(5)   0.0351(4)   -0.0079(3)  0.0046(3)   0.0106(3)  
 O1     0.081(3)    0.088(3)    0.052(2)    -0.048(3)   0.019(2)    0.000(2)   
 O2     0.100(4)    0.057(2)    0.083(3)    -0.025(2)   0.025(3)    0.031(2)   
 O3     0.034(2)    0.140(4)    0.081(3)    -0.005(3)   0.018(2)    0.032(3)   
 O4     0.091(4)    0.231(8)    0.121(5)    -0.094(5)   0.076(4)    -0.047(5)  
 O5     0.068(3)    0.055(3)    0.091(3)    0.010(2)    -0.013(2)   0.012(2)   
 O6     0.090(3)    0.085(3)    0.036(2)    -0.037(3)   -0.005(2)   0.010(2)   
 C1     0.029(3)    0.097(5)    0.046(3)    -0.012(3)   -0.005(2)   0.033(3)   
 C2     0.035(3)    0.083(4)    0.055(3)    0.005(3)    0.009(3)    0.036(3)   
 C3     0.049(3)    0.049(3)    0.059(3)    0.005(3)    0.021(3)    0.026(3)   
 C4     0.038(3)    0.041(3)    0.046(3)    -0.005(2)   0.014(2)    0.016(2)   
 C5     0.025(2)    0.043(2)    0.036(2)    -0.006(2)   0.008(2)    0.016(2)   
 C6     0.027(2)    0.040(2)    0.033(2)    -0.008(2)   0.008(2)    0.013(2)   
 C7     0.034(3)    0.038(3)    0.045(3)    -0.011(2)   0.012(2)    0.007(2)   
 C8     0.044(3)    0.056(3)    0.044(3)    -0.027(3)   0.002(2)    0.004(2)   
 C9     0.029(2)    0.058(3)    0.030(2)    -0.013(2)   0.001(2)    0.012(2)   
 C10    0.025(2)    0.037(2)    0.037(2)    -0.005(2)   0.009(2)    0.011(2)   
 C11    0.030(3)    0.044(3)    0.047(3)    -0.010(2)   0.006(2)    0.018(2)   
 C12    0.036(3)    0.053(3)    0.061(3)    -0.019(2)   0.013(2)    0.011(3)   
 C13    0.027(3)    0.072(3)    0.035(2)    -0.016(2)   0.000(2)    0.003(2)   
 C14    0.036(3)    0.051(3)    0.031(2)    -0.002(2)   0.001(2)    0.011(2)   
 C15    0.032(3)    0.045(3)    0.035(2)    -0.009(2)   0.005(2)    0.016(2)   
 C16    0.047(3)    0.045(3)    0.051(3)    -0.017(2)   0.011(2)    0.011(2)   
 C17    0.032(3)    0.082(4)    0.057(3)    -0.010(3)   0.006(2)    0.034(3)   
 C18    0.042(3)    0.047(3)    0.044(3)    -0.022(2)   0.012(2)    0.007(2)   
 C19    0.058(4)    0.116(6)    0.076(4)    -0.043(4)   0.031(4)    -0.013(4)  
 C20    0.032(3)    0.063(3)    0.046(3)    -0.001(2)   -0.003(2)   0.002(2)   
 C21    0.047(3)    0.056(3)    0.037(3)    -0.009(2)   0.006(2)    0.018(2)   
#------------------------------------------------------------------------------
_refine_special_details                ?
_refine_ls_structure_factor_coef       F
_refine_ls_matrix_type                 full
_refine_ls_weighting_scheme            sigma
_refine_ls_hydrogen_treatment          ?
_refine_ls_extinction_method           Zachariasen_type_2_Gaussian_isotropic
_refine_ls_extinction_coef             10.62325
_refine_ls_abs_structure_details       ?
_refine_ls_abs_structure_Flack         ?
_refine_ls_number_reflns               2492
_refine_ls_number_parameters           307
_refine_ls_number_restraints           0
_refine_ls_number_constraints          ?
_refine_ls_R_factor_all                ?
_refine_ls_R_factor_obs                0.0480
_refine_ls_wR_factor_all               ?
_refine_ls_wR_factor_obs               0.0650
_refine_ls_goodness_of_fit_all         ?
_refine_ls_goodness_of_fit_obs         2.370
_refine_ls_shift/esd_max               0.0680
_refine_ls_shift/esd_mean              ?
_refine_diff_density_min               0.53860
_refine_diff_density_max               -0.79220
#------------------------------------------------------------------------------
_geom_special_details                  ?
loop_
_geom_bond_atom_site_label_1
_geom_bond_atom_site_label_2
_geom_bond_distance
_geom_bond_site_symmetry_1
_geom_bond_site_symmetry_2
_geom_bond_publ_flag
    Mn        C(5)      2.201(4)   ? ? yes
    Mn        C(6)      2.155(4)   ? ? yes
    Mn        C(7)      2.134(5)   ? ? yes
    Mn        C(8)      2.138(5)   ? ? yes
    Mn        C(9)      2.222(4)   ? ? yes
    Mn        C(16)     1.788(5)   ? ? yes
    Mn        C(17)     1.808(6)   ? ? yes
    Mn        C(18)     1.782(5)   ? ? yes
    Cr        C(10)     2.240(4)   ? ? yes
    Cr        C(11)     2.213(5)   ? ? yes
    Cr        C(12)     2.213(6)   ? ? yes
    Cr        C(13)     2.213(5)   ? ? yes
    Cr        C(14)     2.194(5)   ? ? yes
    Cr        C(15)     2.213(4)   ? ? yes
    Cr        C(19)     1.850(6)   ? ? yes
    Cr        C(20)     1.834(6)   ? ? yes
    Cr        C(21)     1.855(5)   ? ? yes
    O(1)      C(18)     1.144(6)   ? ? yes
    O(2)      C(16)     1.146(6)   ? ? yes
    O(3)      C(17)     1.135(6)   ? ? yes
    O(4)      C(19)     1.146(8)   ? ? yes
    O(5)      C(20)     1.159(7)   ? ? yes
    O(6)      C(21)     1.137(6)   ? ? yes
    C(1)      C(2)      1.344(9)   ? ? yes
    C(1)      C(9)      1.431(7)   ? ? yes
    C(2)      C(3)      1.408(9)   ? ? yes
    C(3)      C(4)      1.366(7)   ? ? yes
    C(4)      C(5)      1.421(7)   ? ? yes
    C(5)      C(6)      1.452(6)   ? ? yes
    C(5)      C(9)      1.422(6)   ? ? yes
    C(6)      C(7)      1.423(7)   ? ? yes
    C(6)      C(10)     1.479(6)   ? ? yes
    C(7)      C(8)      1.417(7)   ? ? yes
    C(8)      C(9)      1.421(7)   ? ? yes
    C(10)     C(11)     1.421(6)   ? ? yes
    C(10)     C(15)     1.408(6)   ? ? yes
    C(11)     C(12)     1.392(7)   ? ? yes
    C(12)     C(13)     1.408(7)   ? ? yes
    C(13)     C(14)     1.389(8)   ? ? yes
    C(14)     C(15)     1.408(7)   ? ? yes
#------------------------------------------------------------------------------
loop_
_geom_angle_atom_site_label_1
_geom_angle_atom_site_label_2
_geom_angle_atom_site_label_3
_geom_angle
_geom_angle_site_symmetry_1
_geom_angle_site_symmetry_2
_geom_angle_site_symmetry_3
_geom_bond_publ_flag
   C(5)      Mn        C(6)      38.9(2)    ? ? ? yes
   C(5)      Mn        C(7)      64.3(2)    ? ? ? yes
   C(5)      Mn        C(8)      64.4(2)    ? ? ? yes
   C(5)      Mn        C(9)      37.5(2)    ? ? ? yes
   C(5)      Mn        C(16)     154.6(2)   ? ? ? yes
   C(5)      Mn        C(17)     112.5(2)   ? ? ? yes
   C(5)      Mn        C(18)     98.0(2)    ? ? ? yes
   C(6)      Mn        C(7)      38.7(2)    ? ? ? yes
   C(6)      Mn        C(8)      65.3(2)    ? ? ? yes
   C(6)      Mn        C(9)      63.9(2)    ? ? ? yes
   C(6)      Mn        C(16)     117.0(2)   ? ? ? yes
   C(6)      Mn        C(17)     151.4(2)   ? ? ? yes
   C(6)      Mn        C(18)     93.1(2)    ? ? ? yes
   C(7)      Mn        C(8)      38.8(2)    ? ? ? yes
   C(7)      Mn        C(9)      63.4(2)    ? ? ? yes
   C(7)      Mn        C(16)     91.2(2)    ? ? ? yes
   C(7)      Mn        C(17)     143.1(2)   ? ? ? yes
   C(7)      Mn        C(18)     123.7(2)   ? ? ? yes
   C(8)      Mn        C(9)      38.0(2)    ? ? ? yes
   C(8)      Mn        C(16)     101.2(2)   ? ? ? yes
   C(8)      Mn        C(17)     104.9(2)   ? ? ? yes
   C(8)      Mn        C(18)     158.4(2)   ? ? ? yes
   C(9)      Mn        C(16)     137.8(2)   ? ? ? yes
   C(9)      Mn        C(17)     91.5(2)    ? ? ? yes
   C(9)      Mn        C(18)     131.8(2)   ? ? ? yes
   C(16)     Mn        C(17)     90.9(2)    ? ? ? yes
   C(16)     Mn        C(18)     90.1(2)    ? ? ? yes
   C(17)     Mn        C(18)     93.2(3)    ? ? ? yes
   C(10)     Cr        C(11)     37.2(2)    ? ? ? yes
   C(10)     Cr        C(12)     66.5(2)    ? ? ? yes
   C(10)     Cr        C(13)     78.9(2)    ? ? ? yes
   C(10)     Cr        C(14)     66.9(2)    ? ? ? yes
   C(10)     Cr        C(15)     36.9(2)    ? ? ? yes
   C(10)     Cr        C(19)     149.0(3)   ? ? ? yes
   C(10)     Cr        C(20)     121.8(2)   ? ? ? yes
   C(10)     Cr        C(21)     88.8(2)    ? ? ? yes
   C(11)     Cr        C(12)     36.7(2)    ? ? ? yes
   C(11)     Cr        C(13)     66.6(2)    ? ? ? yes
   C(11)     Cr        C(14)     78.9(2)    ? ? ? yes
   C(11)     Cr        C(15)     66.6(2)    ? ? ? yes
   C(11)     Cr        C(19)     112.2(3)   ? ? ? yes
   C(11)     Cr        C(20)     158.6(2)   ? ? ? yes
   C(11)     Cr        C(21)     94.5(2)    ? ? ? yes
   C(12)     Cr        C(13)     37.1(2)    ? ? ? yes
   C(12)     Cr        C(14)     66.5(2)    ? ? ? yes
   C(12)     Cr        C(15)     78.5(2)    ? ? ? yes
   C(12)     Cr        C(19)     89.1(3)    ? ? ? yes
   C(12)     Cr        C(20)     148.0(2)   ? ? ? yes
   C(12)     Cr        C(21)     123.9(2)   ? ? ? yes
   C(13)     Cr        C(14)     36.7(2)    ? ? ? yes
   C(13)     Cr        C(15)     66.6(2)    ? ? ? yes
   C(13)     Cr        C(19)     93.4(3)    ? ? ? yes
   C(13)     Cr        C(20)     111.2(2)   ? ? ? yes
   C(13)     Cr        C(21)     160.6(2)   ? ? ? yes
   C(14)     Cr        C(15)     37.3(2)    ? ? ? yes
   C(14)     Cr        C(19)     122.1(3)   ? ? ? yes
   C(14)     Cr        C(20)     87.8(2)    ? ? ? yes
   C(14)     Cr        C(21)     147.9(2)   ? ? ? yes
   C(15)     Cr        C(19)     159.1(3)   ? ? ? yes
   C(15)     Cr        C(20)     92.7(2)    ? ? ? yes
   C(15)     Cr        C(21)     111.3(2)   ? ? ? yes
   C(19)     Cr        C(20)     89.0(3)    ? ? ? yes
   C(19)     Cr        C(21)     89.6(3)    ? ? ? yes
   C(20)     Cr        C(21)     88.0(2)    ? ? ? yes
   C(2)      C(1)      C(9)      119.1(6)   ? ? ? yes
   C(1)      C(2)      C(3)      121.7(5)   ? ? ? yes
   C(2)      C(3)      C(4)      121.4(5)   ? ? ? yes
   C(3)      C(4)      C(5)      118.7(5)   ? ? ? yes
   Mn        C(5)      C(4)      125.1(3)   ? ? ? yes
   Mn        C(5)      C(6)      68.8(2)    ? ? ? yes
   Mn        C(5)      C(9)      72.0(2)    ? ? ? yes
   C(4)      C(5)      C(6)      132.9(4)   ? ? ? yes
   C(4)      C(5)      C(9)      119.6(4)   ? ? ? yes
   C(6)      C(5)      C(9)      107.5(4)   ? ? ? yes
   Mn        C(6)      C(5)      72.2(2)    ? ? ? yes
   Mn        C(6)      C(7)      69.8(2)    ? ? ? yes
   Mn        C(6)      C(10)     126.5(3)   ? ? ? yes
   C(5)      C(6)      C(7)      106.8(4)   ? ? ? yes
   C(5)      C(6)      C(10)     126.4(4)   ? ? ? yes
   C(7)      C(6)      C(10)     126.7(4)   ? ? ? yes
   Mn        C(7)      C(6)      71.4(3)    ? ? ? yes
   Mn        C(7)      C(8)      70.8(3)    ? ? ? yes
   C(6)      C(7)      C(8)      109.3(4)   ? ? ? yes
   Mn        C(8)      C(7)      70.5(3)    ? ? ? yes
   Mn        C(8)      C(9)      74.2(3)    ? ? ? yes
   C(7)      C(8)      C(9)      107.5(4)   ? ? ? yes
   Mn        C(9)      C(1)      127.3(4)   ? ? ? yes
   Mn        C(9)      C(5)      70.4(2)    ? ? ? yes
   Mn        C(9)      C(8)      67.8(3)    ? ? ? yes
   C(1)      C(9)      C(5)      119.4(5)   ? ? ? yes
   C(1)      C(9)      C(8)      131.9(5)   ? ? ? yes
   C(5)      C(9)      C(8)      108.8(4)   ? ? ? yes
   Cr        C(10)     C(6)      128.3(3)   ? ? ? yes
   Cr        C(10)     C(11)     70.4(3)    ? ? ? yes
   Cr        C(10)     C(15)     70.5(2)    ? ? ? yes
   C(6)      C(10)     C(11)     120.1(4)   ? ? ? yes
   C(6)      C(10)     C(15)     121.4(4)   ? ? ? yes
   C(11)     C(10)     C(15)     118.5(4)   ? ? ? yes
   Cr        C(11)     C(10)     72.4(3)    ? ? ? yes
   Cr        C(11)     C(12)     71.7(3)    ? ? ? yes
   C(10)     C(11)     C(12)     120.5(4)   ? ? ? yes
   Cr        C(12)     C(11)     71.7(3)    ? ? ? yes
   Cr        C(12)     C(13)     71.4(3)    ? ? ? yes
   C(11)     C(12)     C(13)     120.5(5)   ? ? ? yes
   Cr        C(13)     C(12)     71.5(3)    ? ? ? yes
   Cr        C(13)     C(14)     70.9(3)    ? ? ? yes
   C(12)     C(13)     C(14)     119.5(5)   ? ? ? yes
   Cr        C(14)     C(13)     72.4(3)    ? ? ? yes
   Cr        C(14)     C(15)     72.1(3)    ? ? ? yes
   C(13)     C(14)     C(15)     120.6(4)   ? ? ? yes
   Cr        C(15)     C(10)     72.6(2)    ? ? ? yes
   Cr        C(15)     C(14)     70.6(3)    ? ? ? yes
   C(10)     C(15)     C(14)     120.4(4)   ? ? ? yes
   Mn        C(16)     O(2)      178.7(5)   ? ? ? yes
   Mn        C(17)     O(3)      178.9(5)   ? ? ? yes
   Mn        C(18)     O(1)      176.7(5)   ? ? ? yes
   Cr        C(19)     O(4)      178.8(6)   ? ? ? yes
   Cr        C(20)     O(5)      178.5(5)   ? ? ? yes
   Cr        C(21)     O(6)      177.2(5)   ? ? ? yes
#------------------------------------------------------------------------------
' # = = = end '
#------------------------------------------------------------------------------
data_master_file_afc7*.xtl
The CIF file of compound Cr(CO)3(C6H5C5H4)Ru(PPh3)2Cl (21)
#------------------------------------------------------------------------------
_audit_creation_date                  'Tue Dec 12 07:42:16 1995'
_audit_creation_method                'from TEXRAY.INF file'
_audit_update_record                   ?
#------------------------------------------------------------------------------
_computing_data_collection            'MSC/AFC Diffractometer Control'
_computing_cell_refinement            'MSC/AFC Diffractometer Control'
_computing_data_reduction             'teXsan: PROCESS (MSC)'
_computing_structure_solution          SHELXS86
_computing_structure_refinement       'teXsan: LS (MSC)'
_computing_publication_material       'teXsan: FINISH (MSC)'
#------------------------------------------------------------------------------
_cell_length_a                         14.033(4)
_cell_length_b                         16.163(6)
_cell_length_c                         10.411(3)
_cell_angle_alpha                      104.22(3)
_cell_angle_beta                       103.50(2)
_cell_angle_gamma                      90.81(3)
_cell_volume                           2219(1)
_cell_formula_units_Z                  2.00
_cell_measurement_temperature          20.0
_cell_measurement_reflns_used          24
_cell_measurement_theta_min            18.50
_cell_measurement_theta_max            21.44
#------------------------------------------------------------------------------
_symmetry_cell_setting                 triclinic
_symmetry_space_group_name_H-M        'P -1       '
_symmetry_Int_Tables_number            2
_symmetry_space_group_name_Hall        ?
loop_
_symmetry_equiv_pos_as_xyz
  '   +x,   +y,   +z'
  '   -x,   -y,   -z'
#------------------------------------------------------------------------------
_exptl_crystal_description            'prismatic'
_exptl_crystal_colour                 'red'
_exptl_crystal_size_max                0.300
_exptl_crystal_size_mid                ?
_exptl_crystal_size_min                0.200
_exptl_crystal_density_diffrn          1.437
_exptl_crystal_density_measured        ?
_exptl_crystal_F000                    984.00
_exptl_absorpt_coefficient_mu_cm       7.616
_exptl_absorpt_correction_type         empirical
_exptl_absorpt_process_descript        psi-scan
_exptl_absorpt_correction_T_max        1.000
_exptl_absorpt_correction_T_min        0.885
#------------------------------------------------------------------------------
_diffrn_special_details                none
_diffrn_ambient_temperature            20.0
_diffrn_radiation_wavelength           0.7107
_diffrn_radiation_type                 MoKalpha
_diffrn_radiation_source              'X-ray tube'
_diffrn_radiation_monochromator        graphite
_diffrn_radiation_detector             ?
_diffrn_measurement_device            'AFC7R'
_diffrn_measurement_method            'omega/2-theta scans'

_diffrn_standards_number              3
_diffrn_standards_interval_count      200
_diffrn_standards_decay_\%             -1.05
loop_
_diffrn_standard_refln_index_h
_diffrn_standard_refln_index_k
_diffrn_standard_refln_index_l
   ? ? ?    ? ? ?    ? ? ?  

_diffrn_reflns_number                  5972
_diffrn_reflns_av_R_equivalents        3.16
_diffrn_reflns_av_sigmaI/Inet          ?
_diffrn_reflns_h_min                   0
_diffrn_reflns_h_max                   13
_diffrn_reflns_k_min                   -17
_diffrn_reflns_k_max                   17
_diffrn_reflns_l_min                   -9
_diffrn_reflns_l_max                   9
_diffrn_theta_min                      ?
_diffrn_theta_max                      22.4981
_diffrn_reflns_reduction_process       ?

_diffrn_orient_matrix_11              -0.02599
_diffrn_orient_matrix_12              -0.04893
_diffrn_orient_matrix_13              -0.08183
_diffrn_orient_matrix_21              -0.05112
_diffrn_orient_matrix_22               0.03602
_diffrn_orient_matrix_23              -0.03769
_diffrn_orient_matrix_31               0.04597
_diffrn_orient_matrix_32               0.02015
_diffrn_orient_matrix_33              -0.04823
#------------------------------------------------------------------------------
loop_
_atom_type_symbol
_atom_type_oxidation_number
_atom_type_number_in_cell
_atom_type_scat_dispersion_real
_atom_type_scat_dispersion_imag
_atom_type_scat_source
  C  0   100 0.003 0.002    'International Tables'
  H  0    90 0.000 0.000    'International Tables'
  Cr 0     2 0.321 0.624    'International Tables'
  O  0     8 0.011 0.006    'International Tables'
  P  0     4 0.102 0.094    'International Tables'
  Cl 0     2 0.148 0.159    'International Tables'
  Ru 0     2 -1.259 0.836    'International Tables'
#------------------------------------------------------------------------------
loop_
_atom_site_label
_atom_site_fract_x
_atom_site_fract_y
_atom_site_fract_z
_atom_site_U_iso_or_equiv
_atom_site_thermal_displace_type
_atom_site_calc_flag
_atom_site_calc_attached_atom
 Ru2    0.7278(1)   0.1909(1)   -0.1153(2)  0.0278(5)   Uij ? ?
 Cr1    0.7793(10)  -0.1503(8)  -0.307(1)   0.266(6)    Uij ? ?
 Cl3    0.6881(4)   0.1818(4)   -0.3606(6)  0.044(2)    Uij ? ?
 P3     0.5726(4)   0.2283(4)   -0.0898(6)  0.032(1)    Uij ? ?
 P4     0.8101(5)   0.3245(4)   -0.0702(6)  0.035(2)    Uij ? ?
 O1     0.879(2)    -0.309(2)   -0.388(3)   0.15(1)     Uij ? ?
 O2     0.915(2)    -0.098(2)   -0.032(3)   0.124(9)    Uij ? ?
 O3     0.665(2)    -0.265(2)   -0.172(2)   0.118(8)    Uij ? ?
 O4     0.890(2)    0.165(1)    0.412(2)    0.097(7)    Uij ? ?
 O5     0.2361(5)   0.1556(4)   0.3053(6)   -0.031(1)   Uij ? ?
 C1     0.492(2)    0.304(1)    -0.167(2)   0.033(5)    Uij ? ?
 C2     0.508(2)    0.320(1)    -0.287(2)   0.039(6)    Uij ? ?
 C3     0.346(2)    0.382(2)    -0.190(2)   0.048(7)    Uij ? ?
 C4     0.415(2)    0.336(2)    -0.112(2)   0.050(7)    Uij ? ?
 C5     0.362(2)    0.399(2)    -0.309(2)   0.052(7)    Uij ? ?
 C6     0.569(2)    0.265(1)    0.094(2)    0.034(5)    Uij ? ?
 C7     0.579(2)    0.349(1)    0.158(2)    0.038(6)    Uij ? ?
 C8     0.594(2)    0.374(2)    0.301(3)    0.056(7)    Uij ? ?
 C9     0.599(2)    0.313(2)    0.375(2)    0.048(7)    Uij ? ?
 C10    0.589(2)    0.228(2)    0.312(2)    0.047(6)    Uij ? ?
 C11    0.572(2)    0.200(1)    0.166(2)    0.037(6)    Uij ? ?
 C12    0.440(2)    0.367(1)    -0.359(2)   0.046(7)    Uij ? ?
 C13    0.490(2)    0.072(2)    -0.277(2)   0.047(7)    Uij ? ?
 C14    0.481(2)    0.132(2)    -0.159(2)   0.045(6)    Uij ? ?
 C15    0.398(2)    0.128(2)    -0.102(3)   0.062(8)    Uij ? ?
 C16    0.325(2)    0.058(2)    -0.163(3)   0.062(8)    Uij ? ?
 C17    0.857(2)    0.158(2)    0.024(2)    0.051(7)    Uij ? ?
 C18    0.852(2)    0.105(1)    -0.111(2)   0.048(6)    Uij ? ?
 C19    0.761(2)    0.051(1)    -0.154(2)   0.039(6)    Uij ? ?
 C20    0.705(2)    0.068(1)    -0.053(2)   0.038(6)    Uij ? ?
 C21    0.731(2)    -0.018(1)   -0.280(2)   0.040(6)    Uij ? ?
 C22    0.792(2)    -0.032(2)   -0.376(2)   0.052(7)    Uij ? ?
 C23    0.769(2)    -0.102(2)   -0.493(2)   0.053(7)    Uij ? ?
 C24    0.766(2)    0.483(2)    -0.334(3)   0.066(8)    Uij ? ?
 C25    0.802(2)    0.420(2)    -0.270(3)   0.062(8)    Uij ? ?
 C26    0.765(2)    0.403(1)    -0.167(2)   0.037(6)    Uij ? ?
 C27    0.689(2)    0.450(2)    -0.126(2)   0.050(7)    Uij ? ?
 C28    0.878(2)    0.476(2)    0.130(2)    0.051(7)    Uij ? ?
 C29    0.839(2)    0.391(1)    0.104(2)    0.040(6)    Uij ? ?
 C30    0.821(2)    0.359(2)    0.206(2)    0.049(7)    Uij ? ?
 C31    0.647(2)    -0.076(2)   -0.305(3)   0.055(7)    Uij ? ?
 C32    0.621(2)    -0.144(2)   -0.429(3)   0.069(8)    Uij ? ?
 C33    0.770(2)    0.136(1)    0.060(2)    0.044(6)    Uij ? ?
 C34    0.420(2)    0.003(2)    -0.338(3)   0.057(7)    Uij ? ?
 C35    0.340(2)    0.000(2)    -0.277(3)   0.064(8)    Uij ? ?
 C36    1.018(2)    0.340(2)    0.010(3)    0.062(8)    Uij ? ?
 C37    0.934(2)    0.310(2)    -0.094(2)   0.050(7)    Uij ? ?
 C38    0.938(2)    0.260(2)    -0.225(3)   0.063(8)    Uij ? ?
 C39    1.039(2)    0.243(2)    -0.242(3)   0.079(9)    Uij ? ?
 C40    1.122(2)    0.275(2)    -0.129(3)   0.086(10)   Uij ? ?
 C41    1.111(2)    0.320(2)    -0.008(3)   0.080(9)    Uij ? ?
 C42    0.650(2)    0.512(2)    -0.196(3)   0.061(8)    Uij ? ?
 C43    0.692(2)    0.528(2)    -0.298(3)   0.064(8)    Uij ? ?
 C44    0.689(2)    -0.160(2)   -0.519(3)   0.056(7)    Uij ? ?
 C45    0.850(2)    0.410(2)    0.349(3)    0.068(8)    Uij ? ?
 C46    0.888(2)    0.497(2)    0.377(3)    0.064(8)    Uij ? ?
 C47    0.903(2)    0.529(2)    0.269(3)    0.063(8)    Uij ? ?
 C48    0.844(3)    -0.252(2)   -0.358(4)   0.11(1)     Uij ? ?
 C49    0.869(2)    -0.119(2)   -0.135(3)   0.079(9)    Uij ? ?
 C50    0.707(2)    -0.223(2)   -0.228(3)   0.076(9)    Uij ? ?

loop_
_atom_site_aniso_label
_atom_site_aniso_U_11
_atom_site_aniso_U_22
_atom_site_aniso_U_33
_atom_site_aniso_U_12
_atom_site_aniso_U_13
_atom_site_aniso_U_23
#------------------------------------------------------------------------------
_refine_special_details                ?
_refine_ls_structure_factor_coef       F
_refine_ls_matrix_type                 diagonal
_refine_ls_weighting_scheme            sigma
_refine_ls_hydrogen_treatment          ?
_refine_ls_extinction_method           Zachariasen_type_2_Gaussian_isotropic
_refine_ls_extinction_coef             0.00000
_refine_ls_abs_structure_details       ?
_refine_ls_abs_structure_Flack         ?
_refine_ls_number_reflns               3702
_refine_ls_number_parameters           300
_refine_ls_number_restraints           0
_refine_ls_number_constraints          ?
_refine_ls_R_factor_all                ?
_refine_ls_R_factor_obs                0.081
_refine_ls_wR_factor_all               ?
_refine_ls_wR_factor_obs               0.096
_refine_ls_goodness_of_fit_all         ?
_refine_ls_goodness_of_fit_obs         2.760
_refine_ls_shift/esd_max               2.4660
_refine_ls_shift/esd_mean              ?
_refine_diff_density_min               3.15850
_refine_diff_density_max               -1.84390
#------------------------------------------------------------------------------
_geom_special_details                  ?
loop_
_geom_bond_atom_site_label_1
_geom_bond_atom_site_label_2
_geom_bond_distance
_geom_bond_site_symmetry_1
_geom_bond_site_symmetry_2
_geom_bond_publ_flag
       ?  ?    ?      ? ?  ?
# -- ENTER BONDS HERE, ONE PER LINE --
# e.g. C1 C2 1.541(1) . . yes
#------------------------------------------------------------------------------
loop_
_geom_angle_atom_site_label_1
_geom_angle_atom_site_label_2
_geom_angle_atom_site_label_3
_geom_angle
_geom_angle_site_symmetry_1
_geom_angle_site_symmetry_2
_geom_angle_site_symmetry_3
_geom_bond_publ_flag
# -- ENTER ANGLES HERE, ONE PER LINE --
# e.g. C1 C2 C3 109.4(3) . . . yes
       ?  ?  ?     ?     ? ? ?  ?
#------------------------------------------------------------------------------
' # = = = end '
#------------------------------------------------------------------------------
data_master_file_afc7*.xtl
The CIF file of compound Cr(CO)3(C6H5C5H4)Co(CO)2 (22) 
#------------------------------------------------------------------------------
_audit_creation_date                  'Tue May 14 13:03:53 1996'
_audit_creation_method                'from TEXRAY.INF file'
_audit_update_record                   ?
#------------------------------------------------------------------------------
_computing_data_collection            'MSC/AFC Diffractometer Control'
_computing_cell_refinement            'MSC/AFC Diffractometer Control'
_computing_data_reduction             'teXsan: PROCESS (MSC)'
_computing_structure_solution          ?
_computing_structure_refinement       'teXsan: LS (MSC)'
_computing_publication_material       'teXsan: FINISH (MSC)'
#------------------------------------------------------------------------------
_cell_length_a                         15.083(5)
_cell_length_b                         16.391(5)
_cell_length_c                         6.351(4)
_cell_angle_alpha                      90
_cell_angle_beta                       90
_cell_angle_gamma                      90
_cell_volume                           1570(1)
_cell_formula_units_Z                  4.00
_cell_measurement_temperature          20.0
_cell_measurement_reflns_used          25
_cell_measurement_theta_min            8.56
_cell_measurement_theta_max            14.64
#------------------------------------------------------------------------------
_symmetry_cell_setting                 orthorhombic
_symmetry_space_group_name_H-M        'P 21 21 21 '
_symmetry_Int_Tables_number            19
_symmetry_space_group_name_Hall        ?
loop_
_symmetry_equiv_pos_as_xyz
  '   +x,   +y,   +z'
  '1/2-x,   -y,1/2+z'
  '1/2+x,1/2-y,   -z'
  '   -x,1/2+y,1/2-z'
#------------------------------------------------------------------------------
_exptl_crystal_description            'prismatic'
_exptl_crystal_colour                 'red'
_exptl_crystal_size_max                0.300
_exptl_crystal_size_mid                ?
_exptl_crystal_size_min                0.200
_exptl_crystal_density_diffrn          1.659
_exptl_crystal_density_measured        ?
_exptl_crystal_F000                    784.00
_exptl_absorpt_coefficient_mu_cm       17.691
_exptl_absorpt_correction_type         empirical
_exptl_absorpt_process_descript        psi-scan
_exptl_absorpt_correction_T_max        1.000
_exptl_absorpt_correction_T_min        0.863
#------------------------------------------------------------------------------
_diffrn_special_details                none
_diffrn_ambient_temperature            20.0
_diffrn_radiation_wavelength           0.7107
_diffrn_radiation_type                 MoKalpha
_diffrn_radiation_source              'X-ray tube'
_diffrn_radiation_monochromator        graphite
_diffrn_radiation_detector             ?
_diffrn_measurement_device            'AFC7R'
_diffrn_measurement_method            'omega/2-theta scans'

_diffrn_standards_number              3
_diffrn_standards_interval_count      300
_diffrn_standards_decay_\%             6.05
loop_
_diffrn_standard_refln_index_h
_diffrn_standard_refln_index_k
_diffrn_standard_refln_index_l
   ? ? ?    ? ? ?    ? ? ?  

_diffrn_reflns_number                  1641
_diffrn_reflns_av_R_equivalents        0.00
_diffrn_reflns_av_sigmaI/Inet          ?
_diffrn_reflns_h_min                   0
_diffrn_reflns_h_max                   17
_diffrn_reflns_k_min                   0
_diffrn_reflns_k_max                   19
_diffrn_reflns_l_min                   0
_diffrn_reflns_l_max                   7
_diffrn_theta_min                      ?
_diffrn_theta_max                      24.9954
_diffrn_reflns_reduction_process       ?

_diffrn_orient_matrix_11               0.00259
_diffrn_orient_matrix_12              -0.06050
_diffrn_orient_matrix_13              -0.01940
_diffrn_orient_matrix_21              -0.06542
_diffrn_orient_matrix_22              -0.00352
_diffrn_orient_matrix_23               0.02383
_diffrn_orient_matrix_31              -0.01042
_diffrn_orient_matrix_32               0.00706
_diffrn_orient_matrix_33              -0.15442
#------------------------------------------------------------------------------
loop_
_atom_type_symbol
_atom_type_oxidation_number
_atom_type_number_in_cell
_atom_type_scat_dispersion_real
_atom_type_scat_dispersion_imag
_atom_type_scat_source
  C  0    64 0.003 0.002    'International Tables'
  H  0    36 0.000 0.000    'International Tables'
  O  0    20 0.011 0.006    'International Tables'
  Cr 0     4 0.321 0.624    'International Tables'
  Co 0     4 0.349 0.972    'International Tables'
#------------------------------------------------------------------------------
loop_
_atom_site_label
_atom_site_fract_x
_atom_site_fract_y
_atom_site_fract_z
_atom_site_U_iso_or_equiv
_atom_site_thermal_displace_type
_atom_site_calc_flag
_atom_site_calc_attached_atom
 Co1    0.05640(8)  0.01730(7)  0.2711(2)   0.0432      Uij ? ?
 Cr1    -0.22499(8) 0.19960(8)  0.0645(2)   0.0355      Uij ? ?
 O1     -0.2930(6)  0.3320(5)   0.341(2)    0.1130      Uij ? ?
 O2     -0.3945(4)  0.1997(5)   -0.180(1)   0.0960      Uij ? ?
 O3     -0.3022(5)  0.0792(5)   0.367(1)    0.0843      Uij ? ?
 O4     0.0541(6)   -0.1104(5)  -0.040(1)   0.0982      Uij ? ?
 O5     0.2418(5)   0.0533(5)   0.213(2)    0.1271      Uij ? ?
 C1     -0.1525(7)  0.2456(7)   -0.214(2)   0.0565      Uij ? ?
 C2     -0.1171(7)  0.2812(6)   -0.040(2)   0.0530      Uij ? ?
 C3     -0.0848(6)  0.2341(5)   0.128(2)    0.0430      Uij ? ?
 C4     -0.0883(5)  0.1478(4)   0.120(1)    0.0338      Uij ? ?
 C5     -0.1263(6)  0.1135(6)   -0.059(2)   0.0444      Uij ? ?
 C6     -0.1597(6)  0.1604(6)   -0.225(2)   0.0508      Uij ? ?
 C7     -0.0534(5)  0.0985(4)   0.290(1)    0.0355      Uij ? ?
 C8     0.0156(6)   0.1196(5)   0.434(2)    0.0451      Uij ? ?
 C9     0.0305(6)   0.0544(6)   0.580(2)    0.0495      Uij ? ?
 C10    -0.0288(6)  -0.0083(6)  0.523(2)    0.0504      Uij ? ?
 C11    -0.0765(5)  0.0157(6)   0.342(2)    0.0444      Uij ? ?
 C12    0.1693(6)   0.0390(7)   0.240(2)    0.0728      Uij ? ?
 C13    0.0551(7)   -0.0592(6)  0.087(2)    0.0596      Uij ? ?
 C14    -0.2718(5)  0.1250(5)   0.247(2)    0.0494      Uij ? ?
 C15    -0.3289(5)  0.2003(6)   -0.081(2)   0.0547      Uij ? ?
 C16    -0.2674(7)  0.2811(6)   0.230(2)    0.0667      Uij ? ?
 H1     0.072(5)    0.175(4)    0.43(1)     0.06(2)     Uij ? ?
 H2     0.085(5)    0.046(5)    0.68(1)     0.07(2)     Uij ? ?
 H3     -0.027(5)   -0.051(5)   0.59(1)     0.04(2)     Uij ? ?
 H4     -0.121(4)   -0.017(4)   0.28(1)     0.03(2)     Uij ? ?
 H5     -0.138(5)   0.066(4)    -0.08(1)    0.03(2)     Uij ? ?
 H6     -0.186(5)   0.123(4)    -0.35(1)    0.05(2)     Uij ? ?
 H7     -0.179(8)   0.259(8)    -0.34(2)    0.15(4)     Uij ? ?
 H8     -0.119(6)   0.329(6)    -0.02(2)    0.06(3)     Uij ? ?
 H9     -0.065(5)   0.253(4)    0.25(1)     0.03(2)     Uij ? ?

loop_
_atom_site_aniso_label
_atom_site_aniso_U_11
_atom_site_aniso_U_22
_atom_site_aniso_U_33
_atom_site_aniso_U_12
_atom_site_aniso_U_13
_atom_site_aniso_U_23
 Co1    0.0392(6)   0.0427(6)   0.0476(8)   0.0102(6)   0.0062(6)   0.0037(6)  
 Cr1    0.0297(6)   0.0339(6)   0.0429(8)   0.0004(7)   0.0020(7)   0.0026(7)  
 O1     0.111(7)    0.099(6)    0.130(8)    0.026(6)    0.036(6)    -0.048(6)  
 O2     0.049(4)    0.111(6)    0.127(8)    0.002(5)    -0.034(5)   0.028(6)   
 O3     0.070(5)    0.095(6)    0.088(6)    -0.035(5)   -0.006(4)   0.040(5)   
 O4     0.133(7)    0.080(6)    0.081(6)    0.026(6)    0.017(7)    -0.027(5)  
 O5     0.050(4)    0.157(8)    0.17(1)     -0.014(5)   0.033(6)    -0.038(8)  
 C1     0.046(6)    0.076(8)    0.047(7)    -0.001(5)   0.009(6)    0.018(7)   
 C2     0.047(5)    0.044(6)    0.068(8)    -0.011(5)   0.003(6)    0.011(6)   
 C3     0.028(5)    0.043(5)    0.057(7)    -0.007(4)   -0.009(5)   -0.001(5)  
 C4     0.041(5)    0.030(4)    0.030(5)    -0.003(4)   0.006(4)    -0.001(4)  
 C5     0.037(5)    0.042(5)    0.054(6)    0.003(5)    0.005(5)    -0.012(6)  
 C6     0.053(6)    0.069(7)    0.030(5)    0.003(5)    -0.001(5)   -0.017(6)  
 C7     0.032(4)    0.036(4)    0.038(5)    -0.001(4)   0.003(5)    -0.004(4)  
 C8     0.041(5)    0.049(5)    0.045(5)    0.003(4)    -0.001(5)   -0.007(5)  
 C9     0.056(6)    0.055(6)    0.037(5)    0.010(5)    0.006(5)    0.007(5)   
 C10    0.057(6)    0.046(6)    0.048(6)    0.008(5)    0.017(5)    0.013(5)   
 C11    0.034(5)    0.045(5)    0.055(6)    -0.003(4)   0.005(4)    -0.007(5)  
 C12    0.053(6)    0.086(8)    0.079(8)    0.011(6)    0.004(7)    0.006(8)   
 C13    0.067(6)    0.059(6)    0.052(6)    0.027(6)    0.014(7)    0.012(6)   
 C14    0.031(4)    0.060(5)    0.057(6)    -0.010(4)   -0.002(6)   0.007(6)   
 C15    0.041(5)    0.059(6)    0.064(7)    0.010(5)    0.000(5)    0.010(7)   
 C16    0.059(6)    0.057(6)    0.084(8)    0.004(5)    0.028(7)    -0.013(7)  
#------------------------------------------------------------------------------
_refine_special_details                ?
_refine_ls_structure_factor_coef       F
_refine_ls_matrix_type                 full
_refine_ls_weighting_scheme            sigma
_refine_ls_hydrogen_treatment          ?
_refine_ls_extinction_method           Zachariasen_type_2_Gaussian_isotropic
_refine_ls_extinction_coef             0.00000
_refine_ls_abs_structure_details       ?
_refine_ls_abs_structure_Flack         ?
_refine_ls_number_reflns               1122
_refine_ls_number_parameters           244
_refine_ls_number_restraints           0
_refine_ls_number_constraints          ?
_refine_ls_R_factor_all                ?
_refine_ls_R_factor_obs                0.0360
_refine_ls_wR_factor_all               ?
_refine_ls_wR_factor_obs               0.0390
_refine_ls_goodness_of_fit_all         ?
_refine_ls_goodness_of_fit_obs         1.490
_refine_ls_shift/esd_max               0.1010
_refine_ls_shift/esd_mean              ?
_refine_diff_density_min               0.32860
_refine_diff_density_max               -0.30490
#------------------------------------------------------------------------------
_geom_special_details                  ?
loop_
_geom_bond_atom_site_label_1
_geom_bond_atom_site_label_2
_geom_bond_distance
_geom_bond_site_symmetry_1
_geom_bond_site_symmetry_2
_geom_bond_publ_flag
    Co(1)     C(7)      2.129(8)   ? ? yes
    Co(1)     C(8)      2.066(9)   ? ? yes
    Co(1)     C(9)      2.091(10)  ? ? yes
    Co(1)     C(10)     2.095(9)   ? ? yes
    Co(1)     C(11)     2.055(8)   ? ? yes
    Co(1)     C(12)     1.75(1)    ? ? yes
    Co(1)     C(13)     1.72(1)    ? ? yes
    Cr(1)     C(1)      2.21(1)    ? ? yes
    Cr(1)     C(2)      2.207(9)   ? ? yes
    Cr(1)     C(3)      2.226(8)   ? ? yes
    Cr(1)     C(4)      2.258(8)   ? ? yes
    Cr(1)     C(5)      2.196(9)   ? ? yes
    Cr(1)     C(6)      2.181(10)  ? ? yes
    Cr(1)     C(14)     1.827(9)   ? ? yes
    Cr(1)     C(15)     1.818(9)   ? ? yes
    Cr(1)     C(16)     1.82(1)    ? ? yes
    O(1)      C(16)     1.16(1)    ? ? yes
    O(2)      C(15)     1.18(1)    ? ? yes
    O(3)      C(14)     1.16(1)    ? ? yes
    O(4)      C(13)     1.16(1)    ? ? yes
    O(5)      C(12)     1.13(1)    ? ? yes
    C(1)      C(2)      1.36(2)    ? ? yes
    C(1)      C(6)      1.40(1)    ? ? yes
    C(1)      H(6)      0.9(1)     ? ? no
    C(2)      C(3)      1.40(1)    ? ? yes
    C(2)      H(5)      0.79(9)    ? ? no
    C(3)      C(4)      1.42(1)    ? ? yes
    C(3)      H(4)      0.89(8)    ? ? no
    C(4)      C(5)      1.39(1)    ? ? yes
    C(4)      C(7)      1.45(1)    ? ? yes
    C(5)      C(6)      1.40(1)    ? ? yes
    C(5)      H(9)      0.81(7)    ? ? no
    C(6)      H(7)      1.06(8)    ? ? no
    C(7)      C(8)      1.43(1)    ? ? yes
    C(7)      C(11)     1.44(1)    ? ? yes
    C(8)      C(9)      1.43(1)    ? ? yes
    C(8)      H(3)      1.24(7)    ? ? no
    C(9)      C(10)     1.41(1)    ? ? yes
    C(9)      H(8)      1.03(9)    ? ? no
    C(10)     C(11)     1.41(1)    ? ? yes
    C(10)     H(2)      0.83(7)    ? ? no
    C(11)     H(1)      0.94(7)    ? ? no
#------------------------------------------------------------------------------
loop_
_geom_angle_atom_site_label_1
_geom_angle_atom_site_label_2
_geom_angle_atom_site_label_3
_geom_angle
_geom_angle_site_symmetry_1
_geom_angle_site_symmetry_2
_geom_angle_site_symmetry_3
_geom_bond_publ_flag
   C(7)      Co(1)     C(8)      39.8(3)    ? ? ? yes
   C(7)      Co(1)     C(9)      67.6(3)    ? ? ? yes
   C(7)      Co(1)     C(10)     66.7(3)    ? ? ? yes
   C(7)      Co(1)     C(11)     40.2(3)    ? ? ? yes
   C(7)      Co(1)     C(12)     129.5(4)   ? ? ? yes
   C(7)      Co(1)     C(13)     119.1(4)   ? ? ? yes
   C(8)      Co(1)     C(9)      40.3(3)    ? ? ? yes
   C(8)      Co(1)     C(10)     66.2(4)    ? ? ? yes
   C(8)      Co(1)     C(11)     67.0(4)    ? ? ? yes
   C(8)      Co(1)     C(12)     100.4(4)   ? ? ? yes
   C(8)      Co(1)     C(13)     158.8(4)   ? ? ? yes
   C(9)      Co(1)     C(10)     39.4(4)    ? ? ? yes
   C(9)      Co(1)     C(11)     67.4(4)    ? ? ? yes
   C(9)      Co(1)     C(12)     103.1(5)   ? ? ? yes
   C(9)      Co(1)     C(13)     148.4(4)   ? ? ? yes
   C(10)     Co(1)     C(11)     39.8(3)    ? ? ? yes
   C(10)     Co(1)     C(12)     136.3(5)   ? ? ? yes
   C(10)     Co(1)     C(13)     111.6(4)   ? ? ? yes
   C(11)     Co(1)     C(12)     167.4(5)   ? ? ? yes
   C(11)     Co(1)     C(13)     97.4(4)    ? ? ? yes
   C(12)     Co(1)     C(13)     94.8(5)    ? ? ? yes
   C(1)      Cr(1)     C(2)      35.9(4)    ? ? ? yes
   C(1)      Cr(1)     C(3)      65.7(4)    ? ? ? yes
   C(1)      Cr(1)     C(4)      78.6(3)    ? ? ? yes
   C(1)      Cr(1)     C(5)      66.3(4)    ? ? ? yes
   C(1)      Cr(1)     C(6)      37.3(4)    ? ? ? yes
   C(1)      Cr(1)     C(14)     157.9(4)   ? ? ? yes
   C(1)      Cr(1)     C(15)     91.1(4)    ? ? ? yes
   C(1)      Cr(1)     C(16)     112.6(5)   ? ? ? yes
   C(2)      Cr(1)     C(3)      36.9(4)    ? ? ? yes
   C(2)      Cr(1)     C(4)      66.5(3)    ? ? ? yes
   C(2)      Cr(1)     C(5)      77.5(4)    ? ? ? yes
   C(2)      Cr(1)     C(6)      66.0(4)    ? ? ? yes
   C(2)      Cr(1)     C(14)     151.7(4)   ? ? ? yes
   C(2)      Cr(1)     C(15)     118.7(5)   ? ? ? yes
   C(2)      Cr(1)     C(16)     89.2(4)    ? ? ? yes
   C(3)      Cr(1)     C(4)      36.8(3)    ? ? ? yes
   C(3)      Cr(1)     C(5)      65.5(3)    ? ? ? yes
   C(3)      Cr(1)     C(6)      78.4(4)    ? ? ? yes
   C(3)      Cr(1)     C(14)     115.0(4)   ? ? ? yes
   C(3)      Cr(1)     C(15)     155.4(4)   ? ? ? yes
   C(3)      Cr(1)     C(16)     92.5(4)    ? ? ? yes
   C(4)      Cr(1)     C(5)      36.4(3)    ? ? ? yes
   C(4)      Cr(1)     C(6)      67.0(3)    ? ? ? yes
   C(4)      Cr(1)     C(14)     90.2(3)    ? ? ? yes
   C(4)      Cr(1)     C(15)     150.3(4)   ? ? ? yes
   C(4)      Cr(1)     C(16)     120.6(4)   ? ? ? yes
   C(5)      Cr(1)     C(6)      37.2(3)    ? ? ? yes
   C(5)      Cr(1)     C(14)     93.4(4)    ? ? ? yes
   C(5)      Cr(1)     C(15)     114.0(4)   ? ? ? yes
   C(5)      Cr(1)     C(16)     156.7(4)   ? ? ? yes
   C(6)      Cr(1)     C(14)     120.8(4)   ? ? ? yes
   C(6)      Cr(1)     C(15)     87.9(4)    ? ? ? yes
   C(6)      Cr(1)     C(16)     149.6(4)   ? ? ? yes
   C(14)     Cr(1)     C(15)     89.5(4)    ? ? ? yes
   C(14)     Cr(1)     C(16)     89.4(4)    ? ? ? yes
   C(15)     Cr(1)     C(16)     89.1(5)    ? ? ? yes
   Cr(1)     C(1)      C(2)      71.9(6)    ? ? ? yes
   Cr(1)     C(1)      C(6)      70.2(6)    ? ? ? yes
   Cr(1)     C(1)      H(6)      123(8)     ? ? ? no
   C(2)      C(1)      C(6)      119(1)     ? ? ? yes
   C(2)      C(1)      H(6)      140(8)     ? ? ? no
   C(6)      C(1)      H(6)      99(8)      ? ? ? no
   Cr(1)     C(2)      C(1)      72.2(6)    ? ? ? yes
   Cr(1)     C(2)      C(3)      72.3(5)    ? ? ? yes
   Cr(1)     C(2)      H(5)      121(7)     ? ? ? no
   C(1)      C(2)      C(3)      121.2(9)   ? ? ? yes
   C(1)      C(2)      H(5)      122(7)     ? ? ? no
   C(3)      C(2)      H(5)      115(7)     ? ? ? no
   Cr(1)     C(3)      C(2)      70.8(5)    ? ? ? yes
   Cr(1)     C(3)      C(4)      72.8(5)    ? ? ? yes
   Cr(1)     C(3)      H(4)      124(4)     ? ? ? no
   C(2)      C(3)      C(4)      120.6(9)   ? ? ? yes
   C(2)      C(3)      H(4)      126(4)     ? ? ? no
   C(4)      C(3)      H(4)      113(4)     ? ? ? no
   Cr(1)     C(4)      C(3)      70.4(5)    ? ? ? yes
   Cr(1)     C(4)      C(5)      69.4(5)    ? ? ? yes
   Cr(1)     C(4)      C(7)      131.2(6)   ? ? ? yes
   C(3)      C(4)      C(5)      116.6(9)   ? ? ? yes
   C(3)      C(4)      C(7)      121.1(8)   ? ? ? yes
   C(5)      C(4)      C(7)      122.2(7)   ? ? ? yes
   Cr(1)     C(5)      C(4)      74.2(5)    ? ? ? yes
   Cr(1)     C(5)      C(6)      70.8(5)    ? ? ? yes
   Cr(1)     C(5)      H(9)      121(5)     ? ? ? no
   C(4)      C(5)      C(6)      122.8(8)   ? ? ? yes
   C(4)      C(5)      H(9)      127(6)     ? ? ? no
   C(6)      C(5)      H(9)      109(5)     ? ? ? no
   Cr(1)     C(6)      C(1)      72.5(7)    ? ? ? yes
   Cr(1)     C(6)      C(5)      72.0(5)    ? ? ? yes
   Cr(1)     C(6)      H(7)      128(4)     ? ? ? no
   C(1)      C(6)      C(5)      118(1)     ? ? ? yes
   C(1)      C(6)      H(7)      129(4)     ? ? ? no
   C(5)      C(6)      H(7)      111(4)     ? ? ? no
   Co(1)     C(7)      C(4)      126.2(6)   ? ? ? yes
   Co(1)     C(7)      C(8)      67.7(5)    ? ? ? yes
   Co(1)     C(7)      C(11)     67.1(4)    ? ? ? yes
   C(4)      C(7)      C(8)      127.4(7)   ? ? ? yes
   C(4)      C(7)      C(11)     127.5(8)   ? ? ? yes
   C(8)      C(7)      C(11)     104.9(8)   ? ? ? yes
   Co(1)     C(8)      C(7)      72.5(5)    ? ? ? yes
   Co(1)     C(8)      C(9)      70.8(5)    ? ? ? yes
   Co(1)     C(8)      H(3)      111(3)     ? ? ? no
   C(7)      C(8)      C(9)      110.4(8)   ? ? ? yes
   C(7)      C(8)      H(3)      130(4)     ? ? ? no
   C(9)      C(8)      H(3)      117(3)     ? ? ? no
   Co(1)     C(9)      C(8)      68.9(5)    ? ? ? yes
   Co(1)     C(9)      C(10)     70.5(6)    ? ? ? yes
   Co(1)     C(9)      H(8)      111(4)     ? ? ? no
   C(8)      C(9)      C(10)     106.2(8)   ? ? ? yes
   C(8)      C(9)      H(8)      127(5)     ? ? ? no
   C(10)     C(9)      H(8)      123(4)     ? ? ? no
   Co(1)     C(10)     C(9)      70.2(5)    ? ? ? yes
   Co(1)     C(10)     C(11)     68.6(5)    ? ? ? yes
   Co(1)     C(10)     H(2)      124(5)     ? ? ? no
   C(9)      C(10)     C(11)     109.2(8)   ? ? ? yes
   C(9)      C(10)     H(2)      116(5)     ? ? ? no
   C(11)     C(10)     H(2)      133(5)     ? ? ? no
   Co(1)     C(11)     C(7)      72.7(5)    ? ? ? yes
   Co(1)     C(11)     C(10)     71.6(5)    ? ? ? yes
   Co(1)     C(11)     H(1)      127(4)     ? ? ? no
   C(7)      C(11)     C(10)     109.0(8)   ? ? ? yes
   C(7)      C(11)     H(1)      127(4)     ? ? ? no
   C(10)     C(11)     H(1)      122(4)     ? ? ? no
   Co(1)     C(12)     O(5)      177(1)     ? ? ? yes
   Co(1)     C(13)     O(4)      179.4(9)   ? ? ? yes
   Cr(1)     C(14)     O(3)      178.1(9)   ? ? ? yes
   Cr(1)     C(15)     O(2)      177.6(9)   ? ? ? yes
   Cr(1)     C(16)     O(1)      177(1)     ? ? ? yes
#------------------------------------------------------------------------------
' # = = = end '
#------------------------------------------------------------------------------
data_master_file_afc7*.xtl
The CIF file of compound [C6H5Cr(CO)3]2C10H10 (23)
#------------------------------------------------------------------------------
_audit_creation_date                  'Tue May 14 13:06:32 1996'
_audit_creation_method                'from TEXRAY.INF file'
_audit_update_record                   ?
#------------------------------------------------------------------------------
_computing_data_collection            'MSC/AFC Diffractometer Control'
_computing_cell_refinement            'MSC/AFC Diffractometer Control'
_computing_data_reduction             'teXsan: PROCESS (MSC)'
_computing_structure_solution          ?
_computing_structure_refinement       'teXsan: LS (MSC)'
_computing_publication_material       'teXsan: FINISH (MSC)'
#------------------------------------------------------------------------------
_cell_length_a                         29.616(8)
_cell_length_b                         12.861(5)
_cell_length_c                         12.397(7)
_cell_angle_alpha                         90
_cell_angle_beta                           90
_cell_angle_gamma                      90
_cell_volume                           4721(6)
_cell_formula_units_Z                  8.00
_cell_measurement_temperature          20.0
_cell_measurement_reflns_used          25
_cell_measurement_theta_min            9.01
_cell_measurement_theta_max            17.20
#------------------------------------------------------------------------------
_symmetry_cell_setting                 orthorhombic
_symmetry_space_group_name_H-M        'P b c a    '
_symmetry_Int_Tables_number            61
_symmetry_space_group_name_Hall        ?
loop_
_symmetry_equiv_pos_as_xyz
  '   +x,   +y,   +z'
  '1/2+x,1/2-y,   -z'
  '   -x,1/2+y,1/2-z'
  '1/2-x,   -y,1/2+z'
  '   -x,   -y,   -z'
  '1/2-x,1/2+y,   +z'
  '   +x,1/2-y,1/2+z'
  '1/2+x,   +y,1/2-z'
#------------------------------------------------------------------------------
_exptl_crystal_description            'prismatic'
_exptl_crystal_colour                 'yellow'
_exptl_crystal_size_max                0.400
_exptl_crystal_size_mid                ?
_exptl_crystal_size_min                0.200
_exptl_crystal_density_diffrn          1.565
_exptl_crystal_density_measured        ?
_exptl_crystal_F000                    2272.00
_exptl_absorpt_coefficient_mu_cm       9.642
_exptl_absorpt_correction_type         empirical
_exptl_absorpt_process_descript        psi-scan
_exptl_absorpt_correction_T_max        1.000
_exptl_absorpt_correction_T_min        0.774
#------------------------------------------------------------------------------
_diffrn_special_details                none
_diffrn_ambient_temperature            20.0
_diffrn_radiation_wavelength           0.7107
_diffrn_radiation_type                 MoKalpha
_diffrn_radiation_source              'X-ray tube'
_diffrn_radiation_monochromator        graphite
_diffrn_radiation_detector             ?
_diffrn_measurement_device            'AFC7R'
_diffrn_measurement_method            'omega/2-theta scans'

_diffrn_standards_number              3
_diffrn_standards_interval_count      150
_diffrn_standards_decay_\%             1.04
loop_
_diffrn_standard_refln_index_h
_diffrn_standard_refln_index_k
_diffrn_standard_refln_index_l
   ? ? ?    ? ? ?    ? ? ?  

_diffrn_reflns_number                  4044
_diffrn_reflns_av_R_equivalents        0.00
_diffrn_reflns_av_sigmaI/Inet          ?
_diffrn_reflns_h_min                   0
_diffrn_reflns_h_max                   35
_diffrn_reflns_k_min                   0
_diffrn_reflns_k_max                   13
_diffrn_reflns_l_min                    0 
_diffrn_reflns_l_max                   14
_diffrn_theta_min                      ?
_diffrn_theta_max                      25.0017
_diffrn_reflns_reduction_process       ?

_diffrn_orient_matrix_11              -0.00229
_diffrn_orient_matrix_12              -0.07717
_diffrn_orient_matrix_13              -0.00820
_diffrn_orient_matrix_21               0.03345
_diffrn_orient_matrix_22              -0.00614
_diffrn_orient_matrix_23               0.00889
_diffrn_orient_matrix_31              -0.00396
_diffrn_orient_matrix_32              -0.00725
_diffrn_orient_matrix_33               0.07975
#------------------------------------------------------------------------------
loop_
_atom_type_symbol
_atom_type_oxidation_number
_atom_type_number_in_cell
_atom_type_scat_dispersion_real
_atom_type_scat_dispersion_imag
_atom_type_scat_source
  C  0   224 0.003 0.002    'International Tables'
  H  0   160 0.000 0.000    'International Tables'
  O  0    48 0.011 0.006    'International Tables'
  Cr 0    16 0.321 0.624    'International Tables'
#------------------------------------------------------------------------------
loop_
_atom_site_label
_atom_site_fract_x
_atom_site_fract_y
_atom_site_fract_z
_atom_site_U_iso_or_equiv
_atom_site_thermal_displace_type
_atom_site_calc_flag
_atom_site_calc_attached_atom
 Cr1    0.05706(5)  0.1059(1)   0.2326(1)   0.0350      Uij ? ?
 Cr2    -0.23052(4) 0.3234(1)   0.3494(1)   0.0337      Uij ? ?
 O1     -0.2952(2)  0.4194(5)   0.5055(6)   0.0706      Uij ? ?
 O2     -0.3083(2)  0.2582(6)   0.2116(6)   0.0782      Uij ? ?
 O3     -0.2473(3)  0.1340(5)   0.4809(5)   0.0662      Uij ? ?
 O4     0.0371(3)   -0.0754(6)  0.0884(6)   0.1025      Uij ? ?
 O5     0.1305(2)   0.1743(7)   0.0823(6)   0.0850      Uij ? ?
 O6     -0.0063(2)  0.2365(5)   0.1032(5)   0.0563      Uij ? ?
 C1     -0.1984(3)  0.4748(7)   0.3076(9)   0.0470      Uij ? ?
 C2     -0.1749(3)  0.4283(7)   0.3946(7)   0.0417      Uij ? ?
 C3     -0.1570(2)  0.3281(7)   0.3829(7)   0.0380      Uij ? ?
 C4     -0.1631(2)  0.2709(6)   0.2865(6)   0.0260      Uij ? ?
 C5     -0.1876(3)  0.3188(8)   0.2044(7)   0.0396      Uij ? ?
 C6     -0.2050(3)  0.4202(7)   0.2146(8)   0.0435      Uij ? ?
 C7     -0.1426(2)  0.1654(7)   0.2695(6)   0.0336      Uij ? ?
 C8     -0.1734(3)  0.0750(7)   0.2325(8)   0.0501      Uij ? ?
 C9     -0.1340(3)  0.0000(7)   0.2128(9)   0.0510      Uij ? ?
 C10    -0.1040(3)  0.0663(9)   0.1432(8)   0.0512      Uij ? ?
 C11    -0.1089(3)  0.1640(8)   0.1750(6)   0.0366      Uij ? ?
 C12    -0.1180(3)  0.1125(7)   0.3658(7)   0.0343      Uij ? ?
 C13    -0.1119(3)  -0.0021(7)  0.3278(8)   0.0453      Uij ? ?
 C14    -0.0615(3)  -0.0260(7)  0.3333(7)   0.0448      Uij ? ?
 C15    -0.0400(3)  0.0753(7)   0.3659(7)   0.0363      Uij ? ?
 C16    -0.0708(3)  0.1474(6)   0.3879(6)   0.0340      Uij ? ?
 C17    0.0096(3)   0.0881(7)   0.3715(7)   0.0349      Uij ? ?
 C18    0.0304(3)   0.1857(8)   0.3758(7)   0.0424      Uij ? ?
 C19    0.0771(3)   0.2017(8)   0.3776(7)   0.0441      Uij ? ?
 C20    0.1041(3)   0.113(1)    0.3691(8)   0.0539      Uij ? ?
 C21    0.0857(3)   0.0131(8)   0.3666(8)   0.0469      Uij ? ?
 C22    0.0383(3)   0.0019(7)   0.3674(8)   0.0410      Uij ? ?
 C23    -0.2697(3)  0.3836(7)   0.4451(8)   0.0491      Uij ? ?
 C24    -0.2787(3)  0.2842(7)   0.2656(8)   0.0439      Uij ? ?
 C25    -0.2403(3)  0.2059(7)   0.4290(7)   0.0380      Uij ? ?
 C26    0.0185(3)   0.1867(8)   0.1505(7)   0.0405      Uij ? ?
 C27    0.1031(3)   0.1484(8)   0.1427(8)   0.0519      Uij ? ?
 C28    0.0460(3)   -0.0053(8)  0.1446(9)   0.0542      Uij ? ?
 H1     -0.2121     0.5476      0.3192      0.0912      Uij ? ?
 H2     -0.1741     0.4511      0.4680      0.0387      Uij ? ?
 H3     -0.1422     0.3093      0.4325      0.0289      Uij ? ?
 H4     -0.1930     0.2843      0.1349      0.0075      Uij ? ?
 H5     -0.2218     0.4475      0.1473      0.0333      Uij ? ?
 H6     0.0170      0.2349      0.3823      0.0153      Uij ? ?
 H7     0.0867      0.2735      0.3103      0.0559      Uij ? ?
 H8     0.1308      0.1130      0.3703      0.0014      Uij ? ?
 H9     0.1040      -0.0404     0.3459      0.0233      Uij ? ?
 H10    0.0269      -0.0644     0.3625      0.0132      Uij ? ?
 H11    -0.0505     -0.0454     0.2610      0.0121      Uij ? ?
 H12    -0.0516     -0.0613     0.3795      0.0287      Uij ? ?
 H13    -0.0643     0.2049      0.4184      0.0492      Uij ? ?
 H14    -0.1393     -0.0726     0.1840      0.0434      Uij ? ?
 H15    -0.1312     -0.0397     0.3657      0.0007      Uij ? ?
 H16    -0.1356     0.1162      0.4353      0.0369      Uij ? ?
 H17    -0.1915     0.0599      0.2855      0.0253      Uij ? ?
 H18    -0.1930     0.0947      0.1692      0.0323      Uij ? ?
 H19    -0.0883     0.2270      0.1621      0.0858      Uij ? ?
 H20    -0.0859     0.0342      0.1084      0.0060      Uij ? ?

loop_
_atom_site_aniso_label
_atom_site_aniso_U_11
_atom_site_aniso_U_22
_atom_site_aniso_U_33
_atom_site_aniso_U_12
_atom_site_aniso_U_13
_atom_site_aniso_U_23
 Cr1    0.0344(8)   0.0366(8)   0.0340(8)   0.0029(8)   0.0016(8)   0.0050(8)  
 Cr2    0.0307(7)   0.0350(8)   0.0354(8)   0.0002(8)   -0.0012(7)  0.0011(8)  
 O1     0.074(5)    0.061(5)    0.077(5)    -0.009(4)   0.032(5)    -0.023(4)  
 O2     0.065(5)    0.074(5)    0.096(7)    -0.021(5)   -0.029(5)   -0.008(5)  
 O3     0.093(5)    0.046(4)    0.059(5)    -0.004(4)   -0.009(5)   0.016(4)   
 O4     0.176(10)   0.058(6)    0.074(6)    -0.031(6)   0.020(6)    -0.031(5)  
 O5     0.054(4)    0.119(7)    0.082(6)    0.000(5)    0.024(4)    0.045(6)   
 O6     0.049(4)    0.063(5)    0.058(5)    0.016(4)    -0.011(4)   0.022(4)   
 C1     0.034(6)    0.037(6)    0.070(7)    -0.005(5)   0.004(6)    0.012(6)   
 C2     0.040(5)    0.043(6)    0.042(6)    -0.002(5)   0.000(5)    -0.010(5)  
 C3     0.021(4)    0.042(6)    0.051(6)    -0.002(5)   -0.004(4)   0.006(6)   
 C4     0.020(4)    0.035(6)    0.023(5)    -0.002(4)   -0.001(4)   -0.004(5)  
 C5     0.031(5)    0.059(7)    0.029(5)    0.003(5)    -0.004(4)   0.002(6)   
 C6     0.042(6)    0.041(7)    0.048(7)    0.004(5)    -0.001(5)   -0.002(6)  
 C7     0.026(4)    0.044(5)    0.030(5)    0.005(5)    -0.008(4)   -0.006(5)  
 C8     0.030(5)    0.059(7)    0.062(7)    0.001(5)    -0.001(5)   -0.005(6)  
 C9     0.040(6)    0.034(6)    0.079(8)    -0.005(5)   -0.003(6)   -0.029(6)  
 C10    0.042(6)    0.066(8)    0.045(6)    0.017(6)    -0.001(6)   -0.016(6)  
 C11    0.034(5)    0.057(7)    0.018(5)    0.002(5)    -0.002(4)   0.012(5)   
 C12    0.037(5)    0.029(6)    0.037(6)    -0.001(5)   0.004(4)    -0.002(5)  
 C13    0.025(5)    0.042(7)    0.069(8)    -0.014(5)   0.012(5)    0.003(5)   
 C14    0.036(5)    0.038(6)    0.060(7)    0.002(5)    0.004(5)    0.000(5)   
 C15    0.035(5)    0.037(6)    0.037(6)    0.005(5)    -0.001(5)   0.011(5)   
 C16    0.034(5)    0.037(6)    0.031(5)    0.002(5)    -0.003(4)   0.002(4)   
 C17    0.031(5)    0.044(6)    0.029(6)    0.000(5)    0.002(4)    0.004(5)   
 C18    0.037(5)    0.037(6)    0.053(7)    0.008(5)    -0.002(5)   -0.015(6)  
 C19    0.046(6)    0.056(7)    0.031(6)    -0.004(5)   -0.006(5)   0.004(5)   
 C20    0.013(5)    0.096(9)    0.053(7)    -0.009(6)   -0.005(5)   0.016(7)   
 C21    0.029(6)    0.067(7)    0.046(7)    0.014(5)    0.004(5)    0.025(6)   
 C22    0.046(6)    0.032(6)    0.045(7)    0.006(5)    -0.003(5)   0.015(5)   
 C23    0.049(6)    0.035(6)    0.063(7)    -0.011(6)   0.007(6)    -0.012(6)  
 C24    0.031(6)    0.048(6)    0.052(6)    -0.009(5)   0.000(5)    0.008(5)   
 C25    0.039(6)    0.031(6)    0.043(6)    0.002(5)    -0.007(5)   -0.006(5)  
 C26    0.028(5)    0.056(7)    0.038(5)    -0.009(5)   0.009(5)    -0.012(6)  
 C27    0.040(6)    0.061(8)    0.055(7)    0.008(5)    -0.002(6)   0.016(6)   
 C28    0.062(8)    0.057(8)    0.044(6)    -0.005(6)   0.007(6)    0.021(6)   
#------------------------------------------------------------------------------
_refine_special_details                ?
_refine_ls_structure_factor_coef       F
_refine_ls_matrix_type                 full
_refine_ls_weighting_scheme            sigma
_refine_ls_hydrogen_treatment          ?
_refine_ls_extinction_method           Zachariasen_type_2_Gaussian_isotropic
_refine_ls_extinction_coef             0.00777
_refine_ls_abs_structure_details       ?
_refine_ls_abs_structure_Flack         ?
_refine_ls_number_reflns               1513
_refine_ls_number_parameters           326
_refine_ls_number_restraints           0
_refine_ls_number_constraints          ?
_refine_ls_R_factor_all                ?
_refine_ls_R_factor_obs                0.0450
_refine_ls_wR_factor_all               ?
_refine_ls_wR_factor_obs               0.0450
_refine_ls_goodness_of_fit_all         ?
_refine_ls_goodness_of_fit_obs         1.360
_refine_ls_shift/esd_max               0.1030
_refine_ls_shift/esd_mean              ?
_refine_diff_density_min               0.29420
_refine_diff_density_max               -0.29020
#------------------------------------------------------------------------------
_geom_special_details                  ?
loop_
_geom_bond_atom_site_label_1
_geom_bond_atom_site_label_2
_geom_bond_distance
_geom_bond_site_symmetry_1
_geom_bond_site_symmetry_2
_geom_bond_publ_flag
    Cr(1)     C(17)     2.235(8)   ? ? yes
    Cr(1)     C(18)     2.197(8)   ? ? yes
    Cr(1)     C(19)     2.259(9)   ? ? yes
    Cr(1)     C(20)     2.193(9)   ? ? yes
    Cr(1)     C(21)     2.214(9)   ? ? yes
    Cr(1)     C(22)     2.211(9)   ? ? yes
    Cr(1)     C(26)     1.85(1)    ? ? yes
    Cr(1)     C(27)     1.84(1)    ? ? yes
    Cr(1)     C(28)     1.83(1)    ? ? yes
    Cr(2)     C(1)      2.228(9)   ? ? yes
    Cr(2)     C(2)      2.203(9)   ? ? yes
    Cr(2)     C(3)      2.216(7)   ? ? yes
    Cr(2)     C(4)      2.248(7)   ? ? yes
    Cr(2)     C(5)      2.203(8)   ? ? yes
    Cr(2)     C(6)      2.217(9)   ? ? yes
    Cr(2)     C(23)     1.83(1)    ? ? yes
    Cr(2)     C(24)     1.835(9)   ? ? yes
    Cr(2)     C(25)     1.828(10)  ? ? yes
    O(1)      C(23)     1.159(10)  ? ? yes
    O(2)      C(24)     1.154(9)   ? ? yes
    O(3)      C(25)     1.146(9)   ? ? yes
    O(4)      C(28)     1.17(1)    ? ? yes
    O(5)      C(27)     1.153(10)  ? ? yes
    O(6)      C(26)     1.138(10)  ? ? yes
    C(1)      C(2)      1.42(1)    ? ? yes
    C(1)      C(6)      1.36(1)    ? ? yes
    C(2)      C(3)      1.40(1)    ? ? yes
    C(3)      C(4)      1.41(1)    ? ? yes
    C(4)      C(5)      1.39(1)    ? ? yes
    C(4)      C(7)      1.50(1)    ? ? yes
    C(5)      C(6)      1.41(1)    ? ? yes
    C(7)      C(8)      1.55(1)    ? ? yes
    C(7)      C(11)     1.54(1)    ? ? yes
    C(7)      C(12)     1.55(1)    ? ? yes
    C(8)      C(9)      1.53(1)    ? ? yes
    C(9)      C(10)     1.50(1)    ? ? yes
    C(9)      C(13)     1.57(1)    ? ? yes
    C(10)     C(11)     1.32(1)    ? ? yes
    C(12)     C(13)     1.56(1)    ? ? yes
    C(12)     C(16)     1.49(1)    ? ? yes
    C(13)     C(14)     1.53(1)    ? ? yes
    C(14)     C(15)     1.51(1)    ? ? yes
    C(15)     C(16)     1.33(1)    ? ? yes
    C(15)     C(17)     1.48(1)    ? ? yes
    C(17)     C(18)     1.40(1)    ? ? yes
    C(17)     C(22)     1.40(1)    ? ? yes
    C(18)     C(19)     1.40(1)    ? ? yes
    C(19)     C(20)     1.40(1)    ? ? yes
    C(20)     C(21)     1.39(1)    ? ? yes
    C(21)     C(22)     1.41(1)    ? ? yes
#------------------------------------------------------------------------------
loop_
_geom_angle_atom_site_label_1
_geom_angle_atom_site_label_2
_geom_angle_atom_site_label_3
_geom_angle
_geom_angle_site_symmetry_1
_geom_angle_site_symmetry_2
_geom_angle_site_symmetry_3
_geom_bond_publ_flag
   C(17)     Cr(1)     C(18)     36.8(3)    ? ? ? yes
   C(17)     Cr(1)     C(19)     66.9(3)    ? ? ? yes
   C(17)     Cr(1)     C(20)     79.0(3)    ? ? ? yes
   C(17)     Cr(1)     C(21)     66.9(3)    ? ? ? yes
   C(17)     Cr(1)     C(22)     36.7(3)    ? ? ? yes
   C(17)     Cr(1)     C(26)     95.3(3)    ? ? ? yes
   C(17)     Cr(1)     C(27)     164.0(4)   ? ? ? yes
   C(17)     Cr(1)     C(28)     105.5(4)   ? ? ? yes
   C(18)     Cr(1)     C(19)     36.6(3)    ? ? ? yes
   C(18)     Cr(1)     C(20)     65.5(3)    ? ? ? yes
   C(18)     Cr(1)     C(21)     77.5(3)    ? ? ? yes
   C(18)     Cr(1)     C(22)     65.3(3)    ? ? ? yes
   C(18)     Cr(1)     C(26)     87.8(3)    ? ? ? yes
   C(18)     Cr(1)     C(27)     128.0(4)   ? ? ? yes
   C(18)     Cr(1)     C(28)     141.5(4)   ? ? ? yes
   C(19)     Cr(1)     C(20)     36.6(3)    ? ? ? yes
   C(19)     Cr(1)     C(21)     66.2(3)    ? ? ? yes
   C(19)     Cr(1)     C(22)     78.2(3)    ? ? ? yes
   C(19)     Cr(1)     C(26)     107.1(4)   ? ? ? yes
   C(19)     Cr(1)     C(27)     97.2(4)    ? ? ? yes
   C(19)     Cr(1)     C(28)     161.6(4)   ? ? ? yes
   C(20)     Cr(1)     C(21)     36.9(3)    ? ? ? yes
   C(20)     Cr(1)     C(22)     66.5(4)    ? ? ? yes
   C(20)     Cr(1)     C(26)     142.6(4)   ? ? ? yes
   C(20)     Cr(1)     C(27)     89.2(4)    ? ? ? yes
   C(20)     Cr(1)     C(28)     127.3(5)   ? ? ? yes
   C(21)     Cr(1)     C(22)     37.2(3)    ? ? ? yes
   C(21)     Cr(1)     C(26)     162.3(3)   ? ? ? yes
   C(21)     Cr(1)     C(27)     109.3(4)   ? ? ? yes
   C(21)     Cr(1)     C(28)     95.4(4)    ? ? ? yes
   C(22)     Cr(1)     C(26)     126.9(3)   ? ? ? yes
   C(22)     Cr(1)     C(27)     145.3(4)   ? ? ? yes
   C(22)     Cr(1)     C(28)     86.1(4)    ? ? ? yes
   C(26)     Cr(1)     C(27)     87.5(4)    ? ? ? yes
   C(26)     Cr(1)     C(28)     90.0(4)    ? ? ? yes
   C(27)     Cr(1)     C(28)     90.2(4)    ? ? ? yes
   C(1)      Cr(2)     C(2)      37.3(3)    ? ? ? yes
   C(1)      Cr(2)     C(3)      66.4(3)    ? ? ? yes
   C(1)      Cr(2)     C(4)      78.6(3)    ? ? ? yes
   C(1)      Cr(2)     C(5)      65.6(3)    ? ? ? yes
   C(1)      Cr(2)     C(6)      35.7(3)    ? ? ? yes
   C(1)      Cr(2)     C(23)     92.9(4)    ? ? ? yes
   C(1)      Cr(2)     C(24)     116.2(4)   ? ? ? yes
   C(1)      Cr(2)     C(25)     156.3(4)   ? ? ? yes
   C(2)      Cr(2)     C(3)      37.0(3)    ? ? ? yes
   C(2)      Cr(2)     C(4)      66.9(3)    ? ? ? yes
   C(2)      Cr(2)     C(5)      78.0(3)    ? ? ? yes
   C(2)      Cr(2)     C(6)      65.9(3)    ? ? ? yes
   C(2)      Cr(2)     C(23)     92.8(4)    ? ? ? yes
   C(2)      Cr(2)     C(24)     153.4(4)   ? ? ? yes
   C(2)      Cr(2)     C(25)     119.2(4)   ? ? ? yes
   C(3)      Cr(2)     C(4)      36.9(3)    ? ? ? yes
   C(3)      Cr(2)     C(5)      65.6(3)    ? ? ? yes
   C(3)      Cr(2)     C(6)      77.9(3)    ? ? ? yes
   C(3)      Cr(2)     C(23)     119.3(4)   ? ? ? yes
   C(3)      Cr(2)     C(24)     151.3(4)   ? ? ? yes
   C(3)      Cr(2)     C(25)     94.5(4)    ? ? ? yes
   C(4)      Cr(2)     C(5)      36.5(3)    ? ? ? yes
   C(4)      Cr(2)     C(6)      66.7(3)    ? ? ? yes
   C(4)      Cr(2)     C(23)     156.1(3)   ? ? ? yes
   C(4)      Cr(2)     C(24)     114.3(3)   ? ? ? yes
   C(4)      Cr(2)     C(25)     94.6(3)    ? ? ? yes
   C(5)      Cr(2)     C(6)      37.2(3)    ? ? ? yes
   C(5)      Cr(2)     C(23)     155.0(4)   ? ? ? yes
   C(5)      Cr(2)     C(24)     88.9(4)    ? ? ? yes
   C(5)      Cr(2)     C(25)     120.7(4)   ? ? ? yes
   C(6)      Cr(2)     C(23)     117.9(4)   ? ? ? yes
   C(6)      Cr(2)     C(24)     89.6(4)    ? ? ? yes
   C(6)      Cr(2)     C(25)     157.7(4)   ? ? ? yes
   C(23)     Cr(2)     C(24)     89.5(4)    ? ? ? yes
   C(23)     Cr(2)     C(25)     84.2(4)    ? ? ? yes
   C(24)     Cr(2)     C(25)     87.4(4)    ? ? ? yes
   Cr(2)     C(1)      C(2)      70.4(5)    ? ? ? yes
   Cr(2)     C(1)      C(6)      71.7(5)    ? ? ? yes
   C(2)      C(1)      C(6)      119.8(8)   ? ? ? yes
   Cr(2)     C(2)      C(1)      72.3(5)    ? ? ? yes
   Cr(2)     C(2)      C(3)      72.0(5)    ? ? ? yes
   C(1)      C(2)      C(3)      119.6(8)   ? ? ? yes
   Cr(2)     C(3)      C(2)      71.0(5)    ? ? ? yes
   Cr(2)     C(3)      C(4)      72.8(4)    ? ? ? yes
   C(2)      C(3)      C(4)      121.3(8)   ? ? ? yes
   Cr(2)     C(4)      C(3)      70.3(4)    ? ? ? yes
   Cr(2)     C(4)      C(5)      70.0(5)    ? ? ? yes
   Cr(2)     C(4)      C(7)      132.8(5)   ? ? ? yes
   C(3)      C(4)      C(5)      116.9(7)   ? ? ? yes
   C(3)      C(4)      C(7)      122.6(7)   ? ? ? yes
   C(5)      C(4)      C(7)      120.5(7)   ? ? ? yes
   Cr(2)     C(5)      C(4)      73.5(5)    ? ? ? yes
   Cr(2)     C(5)      C(6)      72.0(5)    ? ? ? yes
   C(4)      C(5)      C(6)      122.3(8)   ? ? ? yes
   Cr(2)     C(6)      C(1)      72.6(6)    ? ? ? yes
   Cr(2)     C(6)      C(5)      70.9(5)    ? ? ? yes
   C(1)      C(6)      C(5)      120.0(9)   ? ? ? yes
   C(4)      C(7)      C(8)      118.9(6)   ? ? ? yes
   C(4)      C(7)      C(11)     112.3(7)   ? ? ? yes
   C(4)      C(7)      C(12)     118.5(7)   ? ? ? yes
   C(8)      C(7)      C(11)     98.4(7)    ? ? ? yes
   C(8)      C(7)      C(12)     100.1(7)   ? ? ? yes
   C(11)     C(7)      C(12)     106.0(6)   ? ? ? yes
   C(7)      C(8)      C(9)      94.2(6)    ? ? ? yes
   C(8)      C(9)      C(10)     100.6(8)   ? ? ? yes
   C(8)      C(9)      C(13)     100.6(8)   ? ? ? yes
   C(10)     C(9)      C(13)     106.5(7)   ? ? ? yes
   C(9)      C(10)     C(11)     107.6(8)   ? ? ? yes
   C(7)      C(11)     C(10)     108.0(8)   ? ? ? yes
   C(7)      C(12)     C(13)     103.7(7)   ? ? ? yes
   C(7)      C(12)     C(16)     116.6(7)   ? ? ? yes
   C(13)     C(12)     C(16)     103.3(7)   ? ? ? yes
   C(9)      C(13)     C(12)     102.1(7)   ? ? ? yes
   C(9)      C(13)     C(14)     117.0(8)   ? ? ? yes
   C(12)     C(13)     C(14)     106.9(7)   ? ? ? yes
   C(13)     C(14)     C(15)     104.6(7)   ? ? ? yes
   C(14)     C(15)     C(16)     111.6(7)   ? ? ? yes
   C(14)     C(15)     C(17)     121.9(8)   ? ? ? yes
   C(16)     C(15)     C(17)     126.5(8)   ? ? ? yes
   C(12)     C(16)     C(15)     113.3(7)   ? ? ? yes
   Cr(1)     C(17)     C(15)     126.9(6)   ? ? ? yes
   Cr(1)     C(17)     C(18)     70.1(5)    ? ? ? yes
   Cr(1)     C(17)     C(22)     70.7(5)    ? ? ? yes
   C(15)     C(17)     C(18)     122.6(8)   ? ? ? yes
   C(15)     C(17)     C(22)     120.9(9)   ? ? ? yes
   C(18)     C(17)     C(22)     116.4(8)   ? ? ? yes
   Cr(1)     C(18)     C(17)     73.1(5)    ? ? ? yes
   Cr(1)     C(18)     C(19)     74.1(5)    ? ? ? yes
   C(17)     C(18)     C(19)     124.6(9)   ? ? ? yes
   Cr(1)     C(19)     C(18)     69.3(5)    ? ? ? yes
   Cr(1)     C(19)     C(20)     69.2(5)    ? ? ? yes
   C(18)     C(19)     C(20)     116.3(9)   ? ? ? yes
   Cr(1)     C(20)     C(19)     74.3(5)    ? ? ? yes
   Cr(1)     C(20)     C(21)     72.4(5)    ? ? ? yes
   C(19)     C(20)     C(21)     122.1(8)   ? ? ? yes
   Cr(1)     C(21)     C(20)     70.7(5)    ? ? ? yes
   Cr(1)     C(21)     C(22)     71.3(5)    ? ? ? yes
   C(20)     C(21)     C(22)     118.8(8)   ? ? ? yes
   Cr(1)     C(22)     C(17)     72.6(5)    ? ? ? yes
   Cr(1)     C(22)     C(21)     71.5(6)    ? ? ? yes
   C(17)     C(22)     C(21)     121.6(9)   ? ? ? yes
   Cr(2)     C(23)     O(1)      178.1(8)   ? ? ? yes
   Cr(2)     C(24)     O(2)      178.5(9)   ? ? ? yes
   Cr(2)     C(25)     O(3)      177.9(8)   ? ? ? yes
   Cr(1)     C(26)     O(6)      177.4(8)   ? ? ? yes
   Cr(1)     C(27)     O(5)      176.8(9)   ? ? ? yes
   Cr(1)     C(28)     O(4)      177.2(10)  ? ? ? yes
#------------------------------------------------------------------------------
' # = = = end '
#------------------------------------------------------------------------------
data_master_file_afc7*.xtl
The CIF file of compound Cr(CO)3(C6H5C5H4)Ti(CO)2(C5H5) (7)
#------------------------------------------------------------------------------
_audit_creation_date                  'Tue May 14 13:39:42 1996'
_audit_creation_method                'from TEXRAY.INF file'
_audit_update_record                   ?
#------------------------------------------------------------------------------
_computing_data_collection            'MSC/AFC Diffractometer Control'
_computing_cell_refinement            'MSC/AFC Diffractometer Control'
_computing_data_reduction             'teXsan: PROCESS (MSC)'
_computing_structure_solution          SHELXS86
_computing_structure_refinement       'teXsan: LS (MSC)'
_computing_publication_material       'teXsan: FINISH (MSC)'
#------------------------------------------------------------------------------
_cell_length_a                         12.361(4)
_cell_length_b                         12.487(6)
_cell_length_c                         12.531(7)
_cell_angle_alpha                      90
_cell_angle_beta                       93.48(4)
_cell_angle_gamma                      90
_cell_volume                           1930(1)
_cell_formula_units_Z                  4.00
_cell_measurement_temperature          20.0
_cell_measurement_reflns_used          24
_cell_measurement_theta_min            18.67
_cell_measurement_theta_max            21.58
#------------------------------------------------------------------------------
_symmetry_cell_setting                 monoclinic
_symmetry_space_group_name_H-M        'P 21/c     '
_symmetry_Int_Tables_number            14
_symmetry_space_group_name_Hall        ?
loop_
_symmetry_equiv_pos_as_xyz
  '   +x,   +y,   +z'
  '   -x,1/2+y,1/2-z'
  '   -x,   -y,   -z'
  '   +x,1/2-y,1/2+z'
#------------------------------------------------------------------------------
_exptl_crystal_description            'prismatic'
_exptl_crystal_colour                 'blue'
_exptl_crystal_size_max                0.300
_exptl_crystal_size_mid                ?
_exptl_crystal_size_min                0.100
_exptl_crystal_density_diffrn          1.535
_exptl_crystal_density_measured        ?
_exptl_crystal_F000                    904.00
_exptl_absorpt_coefficient_mu_cm       10.058
_exptl_absorpt_correction_type         empirical
_exptl_absorpt_process_descript        psi-scan
_exptl_absorpt_correction_T_max        1.000
_exptl_absorpt_correction_T_min        0.722
#------------------------------------------------------------------------------
_diffrn_special_details                none
_diffrn_ambient_temperature            20.0
_diffrn_radiation_wavelength           0.7107
_diffrn_radiation_type                 MoKalpha
_diffrn_radiation_source              'X-ray tube'
_diffrn_radiation_monochromator        graphite
_diffrn_radiation_detector             ?
_diffrn_measurement_device            'AFC7R'
_diffrn_measurement_method            'omega/2-theta scans'

_diffrn_standards_number              3
_diffrn_standards_interval_count      150
_diffrn_standards_decay_\%             0.07
loop_
_diffrn_standard_refln_index_h
_diffrn_standard_refln_index_k
_diffrn_standard_refln_index_l
   ? ? ?    ? ? ?    ? ? ?  

_diffrn_reflns_number                  3726
_diffrn_reflns_av_R_equivalents        7.14
_diffrn_reflns_av_sigmaI/Inet          ?
_diffrn_reflns_h_min                   0
_diffrn_reflns_h_max                   14
_diffrn_reflns_k_min                   0
_diffrn_reflns_k_max                   14
_diffrn_reflns_l_min                   -14
_diffrn_reflns_l_max                   14
_diffrn_theta_min                      ?
_diffrn_theta_max                      24.9943
_diffrn_reflns_reduction_process       ?

_diffrn_orient_matrix_11              -0.07923
_diffrn_orient_matrix_12              -0.01481
_diffrn_orient_matrix_13              -0.01276
_diffrn_orient_matrix_21              -0.00970
_diffrn_orient_matrix_22               0.00766
_diffrn_orient_matrix_23               0.07828
_diffrn_orient_matrix_31              -0.01403
_diffrn_orient_matrix_32               0.07833
_diffrn_orient_matrix_33              -0.01007
#------------------------------------------------------------------------------
loop_
_atom_type_symbol
_atom_type_oxidation_number
_atom_type_number_in_cell
_atom_type_scat_dispersion_real
_atom_type_scat_dispersion_imag
_atom_type_scat_source
  C  0    84 0.003 0.002    'International Tables'
  H  0    56 0.000 0.000    'International Tables'
  O  0    20 0.011 0.006    'International Tables'
  Cr 0     4 0.321 0.624    'International Tables'
  Ti 0     4 0.278 0.446    'International Tables'
#------------------------------------------------------------------------------
loop_
_atom_site_label
_atom_site_fract_x
_atom_site_fract_y
_atom_site_fract_z
_atom_site_U_iso_or_equiv
_atom_site_thermal_displace_type
_atom_site_calc_flag
_atom_site_calc_attached_atom
 Cr     0.56917(8)  0.08019(7)  0.79258(8)  0.0304      Uij ? ?
 Ti     0.12140(9)  0.10856(8)  0.70665(9)  0.0314      Uij ? ?
 O1     0.7481(4)   0.0006(4)   0.9412(4)   0.0711      Uij ? ?
 O2     0.7197(5)   0.2503(4)   0.7236(6)   0.1007      Uij ? ?
 O3     0.5042(5)   0.2206(5)   0.9697(4)   0.0966      Uij ? ?
 O4     0.2312(4)   -0.0111(5)  0.5175(4)   0.0814      Uij ? ?
 O5     -0.0249(4)  0.2371(4)   0.5318(4)   0.0749      Uij ? ?
 C1     0.4632(4)   0.0928(5)   0.6421(4)   0.0317      Uij ? ?
 C2     0.5497(5)   0.0227(6)   0.6267(5)   0.0451      Uij ? ?
 C3     0.5681(6)   -0.0664(5)  0.6913(6)   0.0505      Uij ? ?
 C4     0.5020(6)   -0.0832(5)  0.7772(6)   0.0473      Uij ? ?
 C5     0.4171(5)   -0.0140(5)  0.7952(5)   0.0401      Uij ? ?
 C6     0.3949(4)   0.0754(5)   0.7275(4)   0.0295      Uij ? ?
 C7     0.3042(5)   0.1500(4)   0.7443(4)   0.0285      Uij ? ?
 C8     0.2618(5)   0.2296(5)   0.6701(5)   0.0340      Uij ? ?
 C9     0.1836(5)   0.2890(5)   0.7237(6)   0.0423      Uij ? ?
 C10    0.1765(5)   0.2491(5)   0.8250(5)   0.0435      Uij ? ?
 C11    0.2497(5)   0.1634(5)   0.8407(5)   0.0355      Uij ? ?
 C12    0.005(1)    0.0519(9)   0.8356(9)   0.1041      Uij ? ?
 C13    -0.0557(6)  0.0560(7)   0.736(1)    0.0835      Uij ? ?
 C14    -0.0114(7)  -0.0185(6)  0.6713(6)   0.0574      Uij ? ?
 C15    0.0705(6)   -0.0703(6)  0.7269(8)   0.0684      Uij ? ?
 C16    0.0810(8)   -0.0268(9)  0.8279(8)   0.0853      Uij ? ?
 C17    0.6793(6)   0.0308(5)   0.8828(5)   0.0463      Uij ? ?
 C18    0.6611(6)   0.1859(6)   0.7495(6)   0.0569      Uij ? ?
 C19    0.5295(6)   0.1665(6)   0.9012(6)   0.0570      Uij ? ?
 C20    0.1907(5)   0.0316(6)   0.5861(6)   0.0518      Uij ? ?
 C21    0.0286(5)   0.1925(5)   0.5952(5)   0.0462      Uij ? ?
 H1     0.4314      0.1648      0.5975      0.0571      Uij ? ?
 H2     0.6018      0.0385      0.5705      0.0571      Uij ? ?
 H3     0.6374      -0.1185     0.6826      0.0571      Uij ? ?
 H4     0.5239      -0.1520     0.8274      0.0571      Uij ? ?
 H5     0.3720      -0.0269     0.8689      0.0571      Uij ? ?
 H6     0.2941      0.2462      0.5904      0.0571      Uij ? ?
 H7     0.1412      0.3514      0.6860      0.0571      Uij ? ?
 H8     0.1329      0.2696      0.8910      0.0571      Uij ? ?
 H9     0.2701      0.1202      0.9081      0.0571      Uij ? ?
 H10    -0.0283     0.1310      0.8633      0.0571      Uij ? ?
 H11    -0.1224     0.1013      0.6966      0.0571      Uij ? ?
 H12    -0.0311     -0.0331     0.5952      0.0571      Uij ? ?
 H13    0.1070      -0.1355     0.7194      0.0571      Uij ? ?
 H14    0.1539      -0.0542     0.8751      0.0571      Uij ? ?

loop_
_atom_site_aniso_label
_atom_site_aniso_U_11
_atom_site_aniso_U_22
_atom_site_aniso_U_33
_atom_site_aniso_U_12
_atom_site_aniso_U_13
_atom_site_aniso_U_23
 Cr     0.0295(6)   0.0284(5)   0.0329(5)   0.0025(5)   -0.0009(4)  -0.0024(5) 
 Ti     0.0253(6)   0.0295(6)   0.0396(7)   -0.0013(5)  0.0051(5)   0.0015(5)  
 O1     0.064(4)    0.084(4)    0.061(4)    0.011(3)    -0.024(3)   0.016(3)   
 O2     0.055(4)    0.060(4)    0.187(7)    -0.016(3)   0.009(4)    0.026(4)   
 O3     0.128(6)    0.096(5)    0.066(4)    0.027(4)    0.010(4)    -0.044(4)  
 O4     0.051(4)    0.118(5)    0.076(4)    0.002(3)    0.014(3)    -0.046(4)  
 O5     0.076(4)    0.074(4)    0.071(4)    0.016(3)    -0.022(3)   0.016(3)   
 C1     0.026(3)    0.038(4)    0.031(3)    0.005(3)    0.002(2)    -0.006(3)  
 C2     0.030(4)    0.066(5)    0.039(4)    0.006(4)    0.001(3)    -0.017(4)  
 C3     0.042(4)    0.042(4)    0.066(5)    0.012(4)    -0.014(4)   -0.025(4)  
 C4     0.047(4)    0.023(3)    0.070(5)    0.002(3)    -0.013(4)   0.001(3)   
 C5     0.034(4)    0.034(4)    0.052(4)    0.000(3)    0.000(3)    0.010(3)   
 C6     0.026(3)    0.028(3)    0.033(3)    -0.005(3)   -0.001(2)   -0.006(3)  
 C7     0.027(3)    0.027(3)    0.031(3)    -0.007(3)   0.003(3)    0.002(3)   
 C8     0.023(3)    0.027(3)    0.053(4)    -0.004(3)   0.001(3)    0.005(3)   
 C9     0.030(4)    0.027(4)    0.070(5)    0.000(3)    0.003(3)    -0.001(3)  
 C10    0.035(4)    0.044(4)    0.053(4)    -0.004(3)   0.010(3)    -0.017(3)  
 C11    0.026(3)    0.042(4)    0.037(4)    -0.003(3)   -0.001(3)   -0.008(3)  
 C12    0.16(1)     0.068(7)    0.099(8)    -0.056(7)   0.087(8)    -0.032(6)  
 C13    0.033(5)    0.071(7)    0.151(10)   0.003(4)    0.040(6)    0.046(7)   
 C14    0.053(5)    0.061(5)    0.057(5)    -0.020(4)   -0.004(4)   0.012(4)   
 C15    0.058(5)    0.028(4)    0.119(8)    -0.007(4)   -0.004(5)   0.022(5)   
 C16    0.089(8)    0.096(8)    0.066(6)    -0.066(6)   -0.035(5)   0.047(6)   
 C17    0.054(5)    0.045(4)    0.040(4)    0.002(4)    -0.002(4)   0.007(3)   
 C18    0.029(4)    0.049(5)    0.092(6)    -0.002(4)   -0.008(4)   0.006(4)   
 C19    0.062(5)    0.063(5)    0.044(4)    0.010(4)    -0.010(4)   -0.017(4)  
 C20    0.029(4)    0.067(5)    0.060(5)    -0.007(4)   0.004(4)    -0.011(4)  
 C21    0.036(4)    0.047(4)    0.055(5)    -0.001(3)   0.002(3)    0.001(4)   
#------------------------------------------------------------------------------
_refine_special_details                ?
_refine_ls_structure_factor_coef       F
_refine_ls_matrix_type                 full
_refine_ls_weighting_scheme            sigma
_refine_ls_hydrogen_treatment          ?
_refine_ls_extinction_method           Zachariasen_type_2_Gaussian_isotropic
_refine_ls_extinction_coef             0.00000
_refine_ls_abs_structure_details       ?
_refine_ls_abs_structure_Flack         ?
_refine_ls_number_reflns               1893
_refine_ls_number_parameters           253
_refine_ls_number_restraints           0
_refine_ls_number_constraints          ?
_refine_ls_R_factor_all                ?
_refine_ls_R_factor_obs                0.0469
_refine_ls_wR_factor_all               ?
_refine_ls_wR_factor_obs               0.0480
_refine_ls_goodness_of_fit_all         ?
_refine_ls_goodness_of_fit_obs         1.665
_refine_ls_shift/esd_max               0.0323
_refine_ls_shift/esd_mean              ?
_refine_diff_density_min               0.37465
_refine_diff_density_max               -0.37638
#------------------------------------------------------------------------------
_geom_special_details                  ?
loop_
_geom_bond_atom_site_label_1
_geom_bond_atom_site_label_2
_geom_bond_distance
_geom_bond_site_symmetry_1
_geom_bond_site_symmetry_2
_geom_bond_publ_flag
       ?  ?    ?      ? ?  ?
# -- ENTER BONDS HERE, ONE PER LINE --
# e.g. C1 C2 1.541(1) . . yes
#------------------------------------------------------------------------------
loop_
_geom_angle_atom_site_label_1
_geom_angle_atom_site_label_2
_geom_angle_atom_site_label_3
_geom_angle
_geom_angle_site_symmetry_1
_geom_angle_site_symmetry_2
_geom_angle_site_symmetry_3
_geom_bond_publ_flag
# -- ENTER ANGLES HERE, ONE PER LINE --
# e.g. C1 C2 C3 109.4(3) . . . yes
       ?  ?  ?     ?     ? ? ?  ?
#------------------------------------------------------------------------------

_publ_requested_journal               'Inorganic Chemistry'

_publ_contact_author
;
    Changtao Qian
 354 Fenglin Ru, Sahnghai, China; zip code  200032
;
_publ_contact_letter
;
    Dear Prof.Kaesz
    Thank you very much for your kind letter of March 5,1996 about paper
    No:95 1630I.Now I am sending you three copies of my manuscript, which
    was revised according to Review's comments, and a signed copyright status
    form. 
    i. (a) The English has been improved.
       (b) Figure Captions were collected in Page 47.
    ii. The manuscript including
        Scheme 1-6
        Table  1-10
        Figure 1-8
        and Supporting Information:Table 11-16 ( 8 pages )
;
_publ_requested_coeditor_name          H.D.Kaesz, Associate Editor
_publ_contact_author_phone            ' 86 - 21 - 64163300 - 3301 '
_publ_contact_author_fax              ' 64166128'
_publ_contact_author_email            ' sunjie@pub.sioc.ac.cn '
loop_
_publ_author_name
_publ_author_address
' Changtao Qian '
;
  354 Fenglin Ru, Shanghai, China; zip code 200032
;

_publ_section_title
;
    Heterobimetallic Complexes with Phenylcyclopentadienyl Ligand
;

_publ_section_abstract
;
    ENTER ABSTRACT
;

_publ_section_experimental
;
    ENTER EXPERIMENTAL SECTION
;

_publ_section_comment
;
    ENTER TEXT
;

_publ_section_references
;
    ENTER REFERENCES
;

_publ_section_figure_captions
;
    List fo figures
    Figure1. The molecular structure of compound [C6H5Cr(CO)3]2C10H10 (23)
    Figure2. Top view of (arene)Cr(CO)3 of (23)
    Figure3. The molecular structure of compound Cr(CO)3C6H5C9H7 (3)
    Figure4. The molecular structure of Cr(CO)3(C6H5C5H4)Ti(CO)2(C5H5) (7)
    Figure5. The molecular structure of Cr(CO)3(C6H5C5H4)Mo(CO)3Br (13)
    Figure6. The molecular structure of Cr(CO)3(C6H5C9H6)Mn(CO)3 (19)
    Figure7. The molecular structure of Cr(CO)3(C6H5C5H4)Ru(PPh3)Cl (21)
    Figure8. The molecular structure of Cr(CO)3(C6H5C5H4)Co(CO)2 (22)
